# Supplementary material for: Array-based detection of isomeric and analogous analytes employing synthetically modified fluorophore attached β-cyclodextrin derivatives
Source: Royal Society of Chemistry journal article supplement (doi:10.1039/c7nj02968c), 2017-01-01
Supplement: c7nj02968c1.pdf [file c7nj02968c1.pdf]

*Electronic Supplementary Information for*

**Array-based detection of isomeric and analogous analytes employing synthetically modified fluorophore attached  $\beta$ -cyclodextrin derivatives**

*Sauradip Chaudhuri, Dana J. DiScenza, Benjamin Smith, Reid Yocum, Mindy Levine*

## TABLE OF CONTENTS

|                                                                              |     |
|------------------------------------------------------------------------------|-----|
| Materials and Methods.....                                                   | S3  |
| Detailed Procedures.....                                                     | S4  |
| Detailed Synthetic Procedures.....                                           | S4  |
| Detailed Fluorescence Modulation Procedures.....                             | S8  |
| Detailed Array Generation Procedures.....                                    | S9  |
| Detailed Procedures for Limit of Detection Experiments .....                 | S10 |
| Detailed Procedures for the HPLC Analysis of <b>S2</b> and <b>S3</b> .....   | S11 |
| Summary Tables.....                                                          | S12 |
| Fluorescence Modulation Summary Table.....                                   | S12 |
| Limit of Detection Summary Table.....                                        | S13 |
| Summary Tables for Arrays.....                                               | S14 |
| Summary Figures.....                                                         | S18 |
| Summary Figures for HPLC Analysis of Compounds <b>S2</b> and <b>S3</b> ..... | S18 |
| Summary Figures for Fluorescence Modulation.....                             | S19 |
| Summary Figures for Limits of Detection.....                                 | S26 |
| Summary Figures for Array Generation Experiments.....                        | S31 |
| NMR Spectra of All New Compounds.....                                        | S34 |
| Spectroscopic Investigations of Sensors <b>S1-S3</b> .....                   | S37 |
| Benesi-Hildebrand Plots for NMR Titration.....                               | S38 |

## **MATERIALS AND METHODS**

All of the reagents were obtained from Sigma Aldrich or Fisher Scientific and used without further purification, unless otherwise noted.  $\beta$ -cyclodextrin was dried in the oven prior to use. Reagent grade solvents (99.9% purity) were used for the synthetic reactions. Column chromatography was performed in a Yamazen AKROS-Automatic TLC Smart Flash Chromatography System.  $^1\text{H}$  and  $^{13}\text{C}$  NMR spectra were recorded in a 400 MHz Bruker AVANCE and 500 MHz Varian NMR spectrometer, with assistance from Dr. Al Bach. Mass spectra were recorded in a Bruker Omiflex MALDI-TOF instrument with 2,5-dihydroxybenzoic acid as a matrix at the Department of Chemistry Instrumentation Facility (DCIF) at the Massachusetts Institute of Technology (MIT), with samples run by Dr. Li Li. All of the fluorescence measurements were performed using a Shimadzu RF 5301 spectrophotometer. Both the excitation and emission slit widths were 3 nm. All of the fluorescence spectra were integrated vs. wavenumber on the X-axis using Origin Pro Version 9.1 software. All arrays were generated using SYSTAT Version 13.

## DETAILED PROCEDURES

### DETAILED SYNTHETIC PROCEDURES

#### Overall Synthetic Scheme:

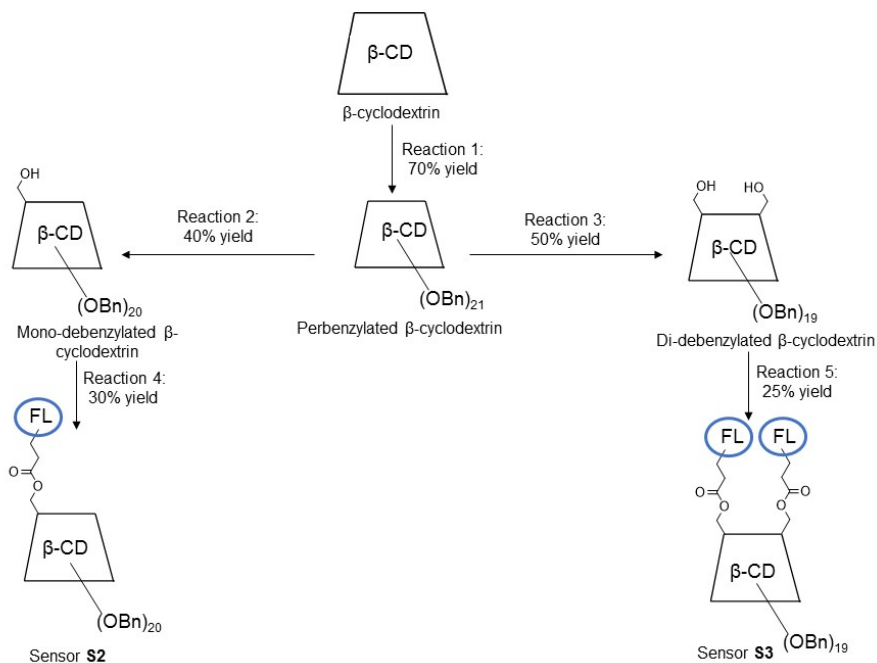

#### Reaction 1: Synthesis of Perbenzylated $\beta$ -Cyclodextrin

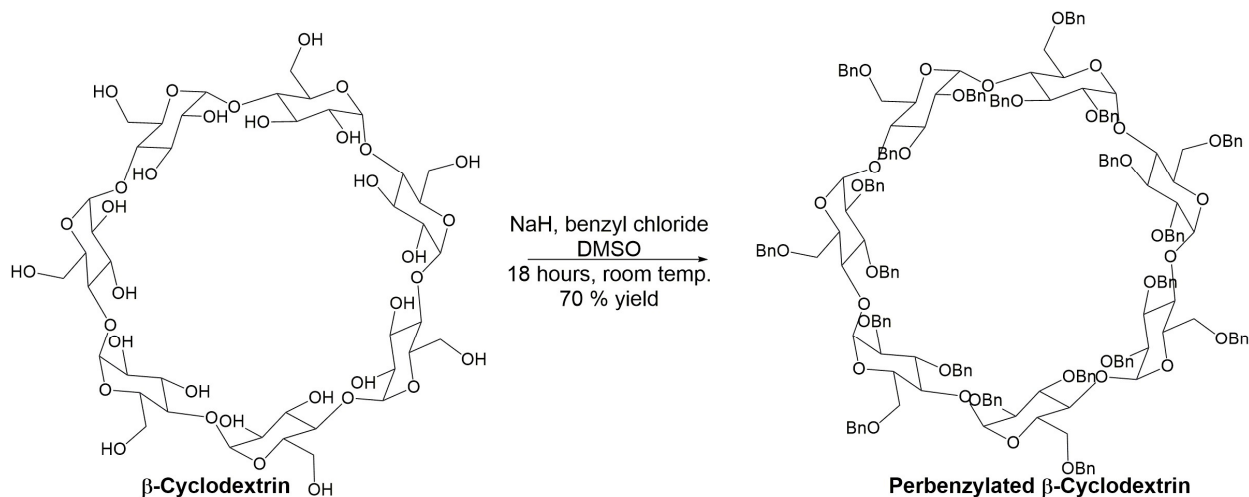

To a stirred solution of oven-dried  $\beta$ -cyclodextrin (2.00 g, 1.76 mmol, 1.0 eq.) in DMSO (100 mL) under nitrogen, sodium hydride (2.60 g, 65 mmol, 36 eq.) was added carefully. The solution was allowed to stir for one hour at room temperature, after which time benzyl chloride (18.5 mL, 65 mmol, 36 eq.) was added over the course of one hour. The reaction mixture was stirred for 18 hours at room temperature, followed by the addition of methanol (20 mL). The reaction mixture was then diluted with water (200 mL) and extracted with diethyl ether (3 x 200 mL). The combined organic layers were washed with brine (200 mL), dried with anhydrous  $\text{Na}_2\text{SO}_4$  and concentrated under reduced pressure. The crude product was purified via column chromatography (25-40% v/v gradient elution of ethyl acetate/hexanes) to obtain a white foamy compound, perbenzylated  $\beta$ -cyclodextrin, (3.6 g, 70 % yield) after being dried under high vacuum.  $^1\text{H}$  NMR

(400 MHz, CDCl<sub>3</sub>):  $\delta$  = 3.52 (dd,  $^3J_{2,3}$  = 9.2 Hz,  $^3J_{2,1}$  = 3.3 Hz, 7 H; 2-H), 3.58 (d,  $^2J$  = 10.6 Hz, 7 H; 6-H), 3.98-4.10 (m, 28 H; 3-H, 4-H, 5-H, 6-H), 4.39, 4.43 (AB,  $J_{A,B}$  = 12.2 Hz, 14 H; CH<sub>2</sub>Ph), 4.50, 4.54 (AB,  $J_{A,B}$  = 12.8 Hz, 14 H; CH<sub>2</sub>Ph), 4.81, 5.11 (AB,  $J_{A,B}$  = 11.0 Hz, 14 H; CH<sub>2</sub>Ph), 5.22 (d,  $^3J_{1,2}$  = 3.3 Hz, 7 H; 1-H), 7.15-7.30 (m, 105 H; aromatic-H) ppm; <sup>13</sup>C NMR (100 MHz, CDCl<sub>3</sub>):  $\delta$  = 69.2, 71.4, 72.6, 73.2, 75.4, 78.6, 78.7, 80.8, 98.4, 126.9-128.3, 138.1, 138.3, 139.2 ppm; MS (MALDI-TOF):  $m/z$  = 3050.49 [M+Na]<sup>+</sup> (Calculated for C<sub>189</sub>H<sub>196</sub>O<sub>35</sub> + Na<sup>+</sup> = 3050.55).

### Reaction 2: Synthesis of Mono-debenzylated $\beta$ -cyclodextrin:

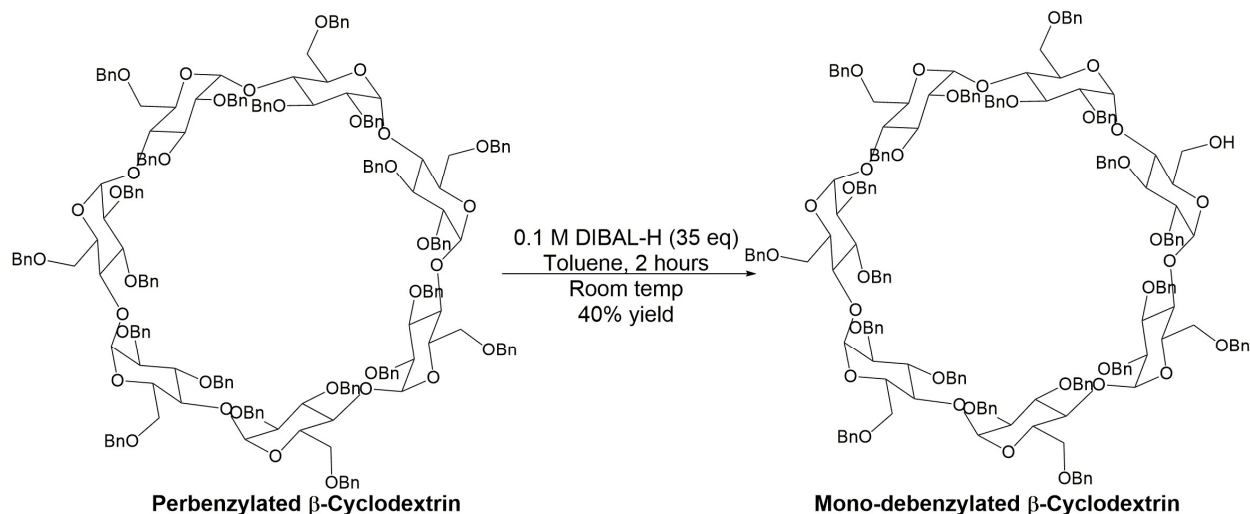

To a stirred solution of perbenzylated  $\beta$ -cyclodextrin (600 mg, 0.2 mmol, 1.0 eq.) in anhydrous toluene (65 mL) under nitrogen, diisobutylaluminum hydride (DIBAL-H) (4.7 mL, 7.0 mmol, 35 eq.) was added dropwise to a final concentration of 0.1 M. The reaction mixture was allowed to stir for 2 hours at room temperature, after which the complete disappearance of starting material was observed via TLC analysis (25% v/v ethyl acetate/hexane). The reaction mixture was cooled to 0 °C and hydrolyzed via the addition of 10% aqueous HCl (15 mL) for 15 minutes. The crude product was extracted with ethyl acetate (100 mL), treated with anhydrous Na<sub>2</sub>SO<sub>4</sub> and dried under reduced pressure. Purification via column chromatography (1:3 ethyl acetate/hexane gradient elution) led to a white compound, mono-debenzylated  $\beta$ -cyclodextrin (250 mg, 40 % yield). <sup>1</sup>H NMR (400 MHz, CDCl<sub>3</sub>):  $\delta$  = 2.48 (br s, 1 H; OH), 3.34-4.07 (m, 42 H; 7x2-H, 7x3-H, 7x4-H, 7x5-H, 14x6-H), 4.27-4.51 (m, 24H; CH<sub>2</sub>Ph), 4.60-4.75 (m, 10H; CH<sub>2</sub>Ph), 4.88-5.01 (m, 6H; 6x1-H), 5.08-5.18 (m, 4 H; CH<sub>2</sub>Ph), 5.25 (dd,  $^3J_{1,2}$  = 12.0, 4.0 Hz, 2 H; CH<sub>2</sub>Ph), 5.36 (d,  $^3J_{1,2}$  = 4.0 Hz, 1 H; 1x1-H), 7.04-7.30 (m, 100 H; aromatic-H) ppm; <sup>13</sup>C NMR (100 MHz, CDCl<sub>3</sub>):  $\delta$  = 61.6, 68.8, 69.2, 69.3, 69.4, 71.4, 71.5, 71.6, 71.7, 71.7, 71.8, 71.9, 72.5, 72.6, 72.7, 72.7, 72.9, 73.0, 73.3, 73.4, 73.4, 74.8, 75.0, 75.1, 75.3, 75.8, 75.9, 75.9, 76.0, 77.4, 77.7, 78.1, 78.8, 79.0, 79.1, 79.5, 79.6, 79.9, 80.1, 80.9, 81.0, 81.0, 81.1, 98.0, 98.3, 98.4, 98.4, 98.6, 98.8, 98.9, 127.0-128.4, 137.9, 138.1, 138.2, 138.2, 138.2, 138.3, 138.3, 138.4, 138.5, 138.5, 139.0, 139.1, 139.3, 139.3, 139.4, 139.4 ppm; MS (MALDI-TOF):  $m/z$  = 2960.29 [M+Na]<sup>+</sup> (Calculated for C<sub>182</sub>H<sub>190</sub>O<sub>35</sub> + Na = 2960.43).

### Reaction 3: Synthesis of Di-debenzylated $\beta$ -cyclodextrin:

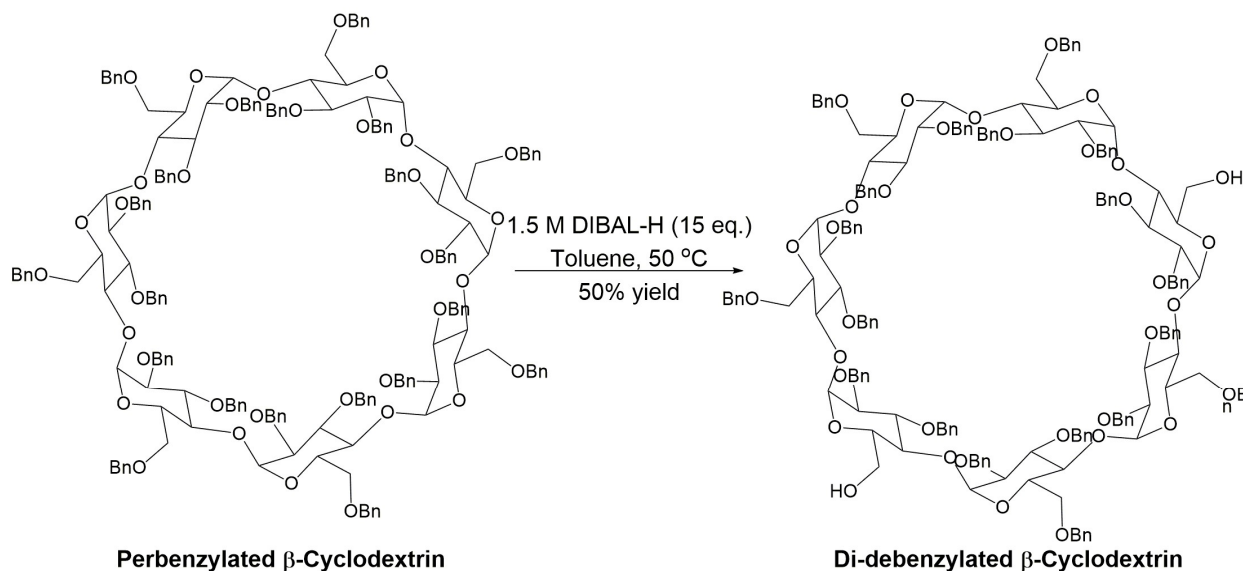

To a stirred solution of perbenzylated  $\beta$ -cyclodextrin (1.2 g, 0.4 mmol, 1.0 eq.) under nitrogen, DIBAL-H (4.0 mL, 6.0 mmol, 15 eq.) was added dropwise. The reaction mixture was stirred for 6 hours at 50 °C until a complete disappearance of starting material was observed via TLC analysis. After an additional 15 minutes of stirring, the reaction mixture was cooled to 0 °C and hydrolyzed by vigorously stirring with 10 % aqueous HCl (15 mL) for 20 minutes. The crude product was extracted with ethyl acetate (100 mL), treated with anhydrous  $\text{Na}_2\text{SO}_4$  and dried under reduced pressure. Purification via column chromatography (1:3 ethyl acetate/hexanes) led to a white compound di-debenzylated  $\beta$ -cyclodextrin (566 mg, 50 % yield).  $^1\text{H}$  NMR (400 MHz,  $\text{CDCl}_3$ ):  $\delta$  = 2.69 (br s, 1 H ; OH), 2.78 (br s, 1 H ; OH), 3.44-3.54 (m, 5 H ; 5x2-H), 3.60-4.15 (m, 37 H ; 2x2-H, 7x3-H, 7x4-H, 7x5-H, 14x6-H), 4.44-4.88 (m, 33 H ;  $\text{CH}_2\text{Ph}$ ), 4.89 (d,  $^3J_{1,2}$  = 3.3 Hz, 1 H ; 1-H), 4.98 (d,  $^3J_{1,2}$  = 3.7 Hz, 1H ; 1-H), 5.00 (d,  $^3J_{1,2}$  = 4.0 Hz, 1 H ; 1-H), 5.02 (d,  $^3J_{1,2}$  = 3.4 Hz, 1 H ; 1-H), 5.04 (d,  $^3J_{1,2}$  = 3.5 Hz, 1 H ; 1-H), 5.06 (d,  $^2J$  = 12.3 Hz, 1 H ;  $\text{CH}_2\text{Ph}$ ), 5.21-5.25 (m, 3 H ; 3x $\text{CH}_2\text{Ph}$ ), 5.30 (d,  $^2J$  = 10.7 Hz, 1 H ;  $\text{CH}_2\text{Ph}$ ), 5.56 (d,  $^3J_{1,2}$  = 3.8 Hz, 1 H ; 1-H), 5.67 (d,  $^3J_{1,2}$  = 3.7 Hz, 1 H ; 1-H), 7.12-7.33 (m, 95H ; aromatic-H) ppm;  $^{13}\text{C}$  NMR (100 MHz,  $\text{CDCl}_3$ ):  $\delta$  = 61.6, 69.5, 69.6, 71.2, 71.6, 72.0, 72.1, 72.9, 73.2, 73.25, 73.3, 73.9, 74.1, 76.1, 76.4, 77.6, 79.0, 79.7, 80.6, 80.9, 81.0, 81.6, 81.7, 97.6, 97.7, 98.2, 126.3-128.3, 137.7, 137.8, 137.9, 138.2, 138.6, 137.7, 139.2 ppm; MS (MALDI-TOF):  $m/z$  = 2870.1 [ $\text{M}+\text{Na}$ ] $^+$  (Calculated for  $\text{C}_{175}\text{H}_{184}\text{O}_{35} + \text{Na} = 2870.31$ ).

### Reaction 4: Synthesis of Sensor S2:

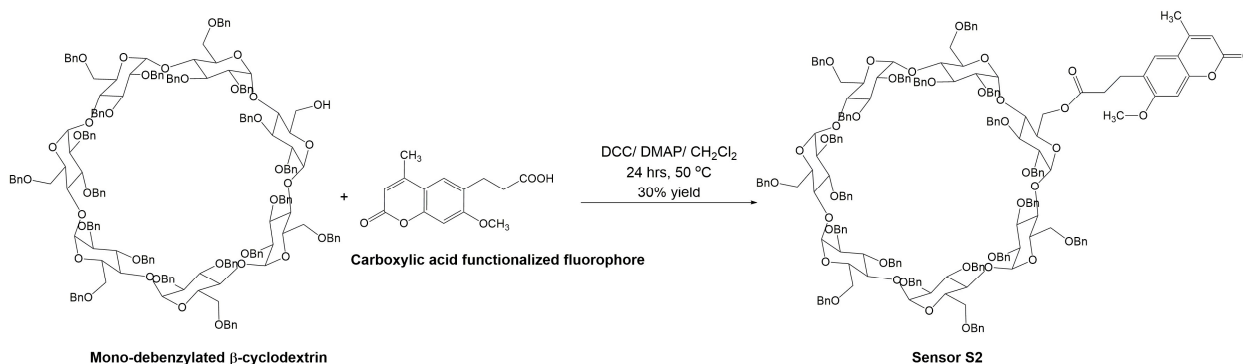

A mixture of mono-debenzylated  $\beta$ -cyclodextrin (100 mg, 0.034 mmol, 1.0 eq.), carboxylic acid functionalized fluorophore (10.5 mg, 0.04 mmol, 1.17 eq.),  $N,N'$ -dicyclohexylcarbodiimide (DCC) (8.3 mg, 0.04 mmol, 1.17 eq.) and 4-dimethylaminopyridine (DMAP) (0.5 mg, 0.004 mmol, 0.1 eq.) in

dichloromethane (1 mL) was stirred at 50 °C for 24 hrs. The mixture was filtered, treated with 5% aqueous acetic acid (2 x 3 mL) and extracted with dichloromethane (2 x 4 mL). The combined organic layer was dried under anhydrous Na<sub>2</sub>SO<sub>4</sub> and subjected to solvent removal under reduced pressure. The crude product was purified via column chromatography (1:3 ethyl acetate/hexanes) to yield a white amorphous compound **sensor S2** (32 mg, 30% yield). <sup>1</sup>H NMR (500 MHz, d<sub>6</sub>-acetone): δ = 2.31 (s, 3 H; ArCH<sub>3</sub>), 2.62 (m, 2 H; CH<sub>2</sub>FL3), 2.93 (t, <sup>3</sup>J<sub>1,2</sub> = <sup>3</sup>J<sub>1,2'</sub> = 10.0 Hz, 2 H; CH<sub>2</sub>CHFL3), 3.43-3.50 (m, 7 H; 2-H), 3.62-3.74 (m, 7 H; 6-H), 3.84 (br t, 2 H; 6-H), 3.89 (s, 3 H; OCH<sub>3</sub>), 3.92-4.16 (m, 26 H; 3-H, 4-H, 5-H, 6-H), 4.40-4.62 (m, 26 H; CH<sub>2</sub>Ph), 4.75-4.78 (m, 7 H; CH<sub>2</sub>Ph), 5.09-5.13 (m, 7 H; CH<sub>2</sub>Ph), 5.16 (d, <sup>3</sup>J<sub>1,2</sub> = 3.5 Hz, 1 H; 1-H), 5.27 (dd, <sup>3</sup>J<sub>1,2</sub> = 10, 3.5 Hz, 2 H; 1-H), 5.30 (m, 3 H; 1-H), 5.33 (d, <sup>3</sup>J<sub>1,2</sub> = 3.5 Hz, 1 H; 1-H), 6.02 (s, 1 H; CH=CCH<sub>3</sub>), 6.86 (s, 1 H; ArH), 7.12-7.33 (m, 80 H; PhH), 7.48 (s, 1 H; ArH) ppm; <sup>13</sup>C NMR (125 MHz, d<sub>6</sub>-acetone): δ = 17.8, 25.3, 33.6, 55.7, 63.5, 69.5, 69.8, 71.7, 71.9, 72.4, 72.7, 73.0, 75.2, 78.3-79.4, 80.8-81.1, 97.8-98.0, 98.2, 98.7, 98.7, 111.5, 112.8, 124.5, 125.6, 126.8, 127.29-128.25, 138.6, 138.7-138.8, 139.5-139.6, 152.8, 154.3, 160.1, 160.6, 172.0 ppm; MS (MALDI-TOF): m/z = 3204.57 [M+Na]<sup>+</sup> (Calculated for C<sub>196</sub>H<sub>202</sub>O<sub>39</sub> + Na = 3204.67).

### Reaction 5: Synthesis of Sensor S3:

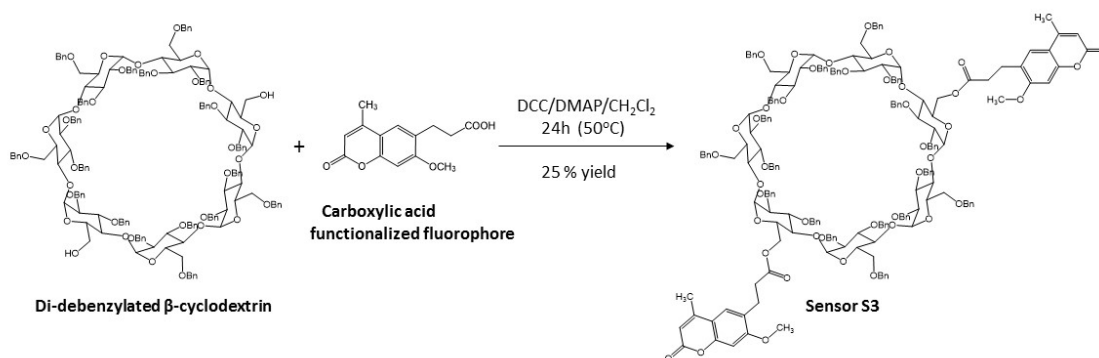

A mixture of di-debenzylated β-cyclodextrin (100 mg, 0.035 mmol, 1.0 eq.), carboxylic acid functionalized fluorophore (21.0 mg, 0.08 mmol, 2.34 eq.), *N,N'*-dicyclohexylcarbodiimide (16.5 mg, 0.08 mmol, 2.34 eq.) and 4-dimethylaminopyridine (1.1 mg, 0.008 mmol, 0.2 eq.) in dichloromethane (1 mL) was stirred at 50 °C for 24 hrs. The mixture was filtered, treated with 5% aqueous acetic acid (2 x 3 mL) and extracted with dichloromethane (2 x 4 mL). The combined organic layer was dried under anhydrous Na<sub>2</sub>SO<sub>4</sub> and subjected to solvent removal under reduced pressure. The crude product was purified via column chromatography (1:3 ethyl acetate: hexanes) to lead to a white amorphous compound **Sensor S3** (30 mg, 25 % yield). <sup>1</sup>H NMR (500 MHz, d<sub>6</sub>-acetone): δ = 2.31 (s, 6 H; ArCH<sub>3</sub>), 2.62 (m, 4 H; CHFL3), 2.93 (m, 4 H; CHCHFL3), 3.44-3.51 (m, 7 H; 2-H), 3.62-3.74 (m, 7 H; 6-H), 3.82-3.89 (multiplet overlapped, 4 H; 6-H), 3.89 (singlet overlapped, 6 H; OCH<sub>3</sub>), 3.94-4.16 (m, 24 H; 3-H, 4-H, 5-H, 6-H), 4.41-4.64 (m, 26 H; CH<sub>2</sub>Ph), 4.74-4.78 (m, 6 H; CH<sub>2</sub>Ph), 5.08-5.12 (m, 6 H; CH<sub>2</sub>Ph), 5.22 (dd, <sup>3</sup>J<sub>1,2</sub> = 8.5, 3.5 Hz, 2 H; 1-H), 5.26 (m, 3 H; 1-H), 5.29 (m, 2 H; 1-H), 6.01 (s, 2 H; CH=CCH<sub>3</sub>), 6.86 (s, 2 H; ArH), 7.06-7.30 (m, 80 H; PhH), 7.46 (d, <sup>3</sup>J<sub>1,2</sub> = 6.5 Hz, 2 H; ArH) ppm; <sup>13</sup>C NMR (125 MHz, d<sub>6</sub>-acetone): δ = 17.8, 24.6, 25.2-25.4, 25.6, 25.8, 30.6, 32.1, 33.5, 34.1, 55.7, 63.5, 69.3-69.8, 71.6-73.1, 75.2, 78.3-79.4, 80.7-81.0, 97.9-98.7, 111.5, 112.7, 125.4-125.5, 126.8, 127.3-128.3, 138.6, 138.7-138.8, 139.4-139.6, 152.7, 154.3, 160.0, 160.6, 172.1 ppm; MS (MALDI-TOF): m/z = 3358.82 [M+Na]<sup>+</sup> (Calculated for C<sub>203</sub>H<sub>208</sub>O<sub>43</sub> + Na = 3358.40).

## DETAILED PROCEDURES FOR FLUORESCENCE MODULATION EXPERIMENTS

Fluorescence emission spectra were obtained using a Shimadzu RF-5301PC spectrophotofluorimeter with 3 nm excitation and 3 nm emission slit widths. In a quartz cuvette, 0.5 mL of **S1**, **S2**, or **S3** solutions (5  $\mu$ M in DMSO) and 2 mL of DI water were combined. Then, the solution was excited at 320 nm, and the fluorescence emission spectra were recorded. Repeat measurements were recorded for four separate trials.

The fluorescence emission spectra were integrated vs. wavenumber on the X-axis, and fluorescence modulation was measured by the ratio of integrated emission of the fluorophore in the presence of the analyte to integrated emission of the fluorophore in the absence of the analyte, as shown in Equation 1:

$$\text{Fluorescence Modulation} = F_{\text{analyte}} / F_{\text{blank}} \quad (\text{Eq. 1})$$

Where  $F_{\text{analyte}}$  is the integrated fluorescence emission of the fluorophore in the presence of 10  $\mu$ L of analyte (1 mg/mL in THF), and  $F_{\text{blank}}$  is the integrated fluorescence emission of the fluorophore in the absence of the analyte.



## **DETAILED PROCEDURES FOR ARRAY GENERATION EXPERIMENTS**

Array analysis was performed using SYSTAT 13 statistical computing software with the following settings:

- (a) Classical Discriminant Analysis
- (b) Grouping Variable: Analytes
- (c) Predictors: **S1**, **S2**, and **S3**
- (d) Long-Range Statistics: Mahal

## DETAILED PROCEDURES FOR LIMIT OF DETECTION EXPERIMENTS

The limit of detection (LOD) is defined as the lowest concentration of analyte at which a signal can be detected. To determine this value, the following steps were performed for each cyclodextrin-analyte combination. In a quartz cuvette, 0.5 mL of **S1**, **S2**, or **S3** solutions (5  $\mu\text{M}$  in DMSO) and 2 mL of deionized (DI) water were combined. Then, the solution was excited at 320 nm, and the fluorescence emission spectra were recorded starting at 330 nm. Six repeat measurements were taken.

Next, 2  $\mu\text{L}$  of analyte (1 mg/mL in THF) was added, and again the solution was excited at the fluorophore's excitation wavelength, and the fluorescence emission spectra were recorded. Six repeat measurements were taken. This step was repeated for 4  $\mu\text{L}$  of analyte, 6  $\mu\text{L}$  of analyte, 8  $\mu\text{L}$  of analyte, 10  $\mu\text{L}$  of analyte, 12  $\mu\text{L}$  of analyte, 14  $\mu\text{L}$  of analyte, 16  $\mu\text{L}$  of analyte, 18  $\mu\text{L}$  of analyte, 20  $\mu\text{L}$  of analyte.

All of the fluorescence emission spectra were integrated vs. wavenumber on the X-axis, and calibration curves were generated. The curves plotted the analyte concentration in  $\mu\text{M}$  on the X-axis, and the fluorescence modulation ratio on the Y-axis. The curve was fitted to a straight line and the equation of the line was determined.

The limit of detection is defined according to Equation S2:

$$\text{LOD} = 3(\text{SD}_{\text{blank}})/m \quad (\text{Eq. S2})$$

Where  $\text{SD}_{\text{blank}}$  is the standard deviation of the blank sample and  $m$  is the slope of the calibration curve. In cases where the slope of the trendline was negative, the absolute value of the slope was used to calculate the LOD. In all cases, the LOD was calculated in  $\mu\text{M}$ .

### **DETAILED PROCEDURES FOR THE HPLC ANALYSIS OF S2 AND S3**

The HPLC analysis of the cyclodextrin-fluorophore covalent hosts was performed on a Waters Acquity® Arc™ system using a Waters 2998 Photo Diode Array (PDA) detector and a Cortecs® C18 2.7 μm 4.6x50 mm column. The solvent system was an isocratic solution of 0.1% formic acid in acetonitrile, run at a rate of 1 mL/minute for 5 minutes. All samples were prepared in the same solution of 0.1% formic acid in acetonitrile. The PDA detector was set to collect from 210-400 nm.

SUMMARY TABLES

FLUORESCENCE MODULATION SUMMARY TABLES

| Analyte          | S1          | S2          | S3          |
|------------------|-------------|-------------|-------------|
| benzyl alcohol   | 1.00 ± 0.00 | 1.04 ± 0.01 | 0.98 ± 0.01 |
| <i>o</i> -cresol | 1.01 ± 0.00 | 0.82 ± 0.01 | 0.88 ± 0.01 |
| <i>m</i> -cresol | 0.99 ± 0.00 | 0.90 ± 0.00 | 1.05 ± 0.02 |
| <i>p</i> -cresol | 1.01 ± 0.01 | 0.87 ± 0.01 | 0.75 ± 0.01 |

| Analyte                            | S1          | S2          | S3          |
|------------------------------------|-------------|-------------|-------------|
| 1-methylcyclohexanol               | 1.01 ± 0.00 | 0.89 ± 0.00 | 1.07 ± 0.05 |
| <i>cis</i> -2-methylcyclohexanol   | 1.01 ± 0.00 | 0.90 ± 0.00 | 0.97 ± 0.01 |
| cyclohexylmethanol                 | 1.01 ± 0.00 | 0.99 ± 0.03 | 0.77 ± 0.06 |
| <i>trans</i> -2-methylcyclohexanol | 0.99 ± 0.00 | 0.89 ± 0.00 | 1.14 ± 0.01 |

| Analyte         | S1          | S2          | S3          |
|-----------------|-------------|-------------|-------------|
| DDD             | 1.00 ± 0.00 | 0.93 ± 0.01 | 1.33 ± 0.03 |
| DDE             | 1.01 ± 0.00 | 0.95 ± 0.01 | 1.07 ± 0.04 |
| <i>o,p</i> -DDT | 0.99 ± 0.01 | 1.08 ± 0.01 | 1.04 ± 0.05 |
| <i>p,p</i> -DDT | 0.98 ± 0.01 | 1.17 ± 0.01 | 1.35 ± 0.05 |

| Analyte              | S1          | S2          | S3          |
|----------------------|-------------|-------------|-------------|
| <i>n</i> -hexanes    | 1.00 ± 0.00 | 1.01 ± 0.01 | 0.94 ± 0.02 |
| 2-methylpentane      | 1.05 ± 0.00 | 1.06 ± 0.00 | 0.93 ± 0.02 |
| 3-methylpentane      | 0.98 ± 0.00 | 1.09 ± 0.01 | 0.95 ± 0.02 |
| 2,3-dimethylbutane   | 1.00 ± 0.00 | 0.99 ± 0.01 | 1.01 ± 0.01 |
| 1-methylcyclopentane | 1.03 ± 0.01 | 1.03 ± 0.02 | 0.89 ± 0.01 |

| Analyte | S1          | S2          | S3          |
|---------|-------------|-------------|-------------|
| PCB3    | 1.03 ± 0.00 | 1.06 ± 0.06 | 0.85 ± 0.01 |
| PCB29   | 1.01 ± 0.01 | 1.02 ± 0.04 | 0.98 ± 0.03 |
| PCB52   | 1.01 ± 0.00 | 1.07 ± 0.04 | 0.89 ± 0.02 |
| PCB77   | 1.05 ± 0.00 | 0.56 ± 0.01 | 0.98 ± 0.01 |
| PCB209  | 1.00 ± 0.01 | 0.92 ± 0.03 | 1.14 ± 0.02 |

**LIMIT OF DETECTION SUMMARY TABLE**

| Analyte              | Host | Equation                | R <sup>2</sup> | LOD (μM) |
|----------------------|------|-------------------------|----------------|----------|
| <i>p,p</i> -DDT      | S1   | $y = 0.0094x + 1.0385$  | 0.939          | 0.39     |
| <i>p,p</i> -DDT      | S2   | $y = 0.011x + 0.971$    | 0.9406         | 0.51     |
| <i>p,p</i> -DDT      | S3   | $y = 0.0188x + 0.9592$  | 0.9547         | 2.20     |
| <i>o</i> -Cresol     | S1   | $y = 0.0018x + 1.0195$  | 0.9748         | 4.97     |
| Benzyl alcohol       | S2   | $y = 0.0032x + 0.932$   | 0.8521         | 8.34     |
| <i>o</i> -Cresol     | S3   | $y = -0.0026x + 0.7242$ | 0.9893         | 11.79    |
| Cyclohexylmethanol   | S1   | $y = 0.01x + 0.9866$    | 0.9708         | 1.17     |
| Cyclohexylmethanol   | S2   | $y = -0.0031x + 0.9648$ | 0.9405         | 1.85     |
| 1-Methylcyclohexanol | S3   | $y = 0.0012x + 0.942$   | 0.9236         | 26.30    |
| 2-Methylpentane      | S1   | $y = 0.0026x + 0.9776$  | 0.9555         | 2.20     |
| 3-Methylpentane      | S2   | $y = 0.0017x + 1.0775$  | 0.9864         | 15.74    |
| 1-Methylcyclopentane | S3   | $y = 0.0038x + 0.7209$  | 0.9421         | 19.82    |
| PCB 77               | S1   | $y = 0.0116x + 1.0153$  | 0.8832         | 0.29     |
| PCB 209              | S2   | $y = -0.0077x + 0.8402$ | 0.9655         | 0.88     |
| PCB 209              | S3   | $y = 0.0079x + 1.0621$  | 0.8686         | 4.59     |

## SUMMARY TABLES FOR ARRAYS

### All analytes

#### Jackknifed Classification Matrix

|                           | 1-methylcyclohexanol | 1-methylcyclopentane | 2,3-dimethylbutane | 2-methylpentane | 3-methylpentane | DDD | DDE |
|---------------------------|----------------------|----------------------|--------------------|-----------------|-----------------|-----|-----|
| 1-methylcyclohexanol      | 4                    | 0                    | 0                  | 0               | 0               | 0   | 0   |
| 1-methylcyclopentane      | 0                    | 4                    | 0                  | 0               | 0               | 0   | 0   |
| 2,3-dimethylbutane        | 0                    | 0                    | 4                  | 0               | 0               | 0   | 0   |
| 2-methylpentane           | 0                    | 0                    | 0                  | 4               | 0               | 0   | 0   |
| 3-methylpentane           | 0                    | 0                    | 0                  | 0               | 4               | 0   | 0   |
| DDD                       | 0                    | 0                    | 0                  | 0               | 0               | 4   | 0   |
| DDE                       | 0                    | 0                    | 0                  | 0               | 0               | 0   | 4   |
| benzyl alcohol            | 0                    | 0                    | 0                  | 0               | 0               | 0   | 0   |
| cis-2methylcyclohexanol   | 0                    | 0                    | 0                  | 0               | 0               | 0   | 0   |
| cyclohexylmethanol        | 0                    | 0                    | 0                  | 0               | 0               | 0   | 0   |
| m-cresol                  | 0                    | 0                    | 0                  | 0               | 0               | 0   | 0   |
| n-hexanes                 | 0                    | 0                    | 0                  | 0               | 0               | 0   | 0   |
| o-cresol                  | 0                    | 0                    | 0                  | 0               | 0               | 0   | 0   |
| opDDT                     | 0                    | 0                    | 0                  | 0               | 0               | 0   | 0   |
| p-cresol                  | 0                    | 0                    | 0                  | 0               | 0               | 0   | 0   |
| pcb209                    | 0                    | 0                    | 0                  | 0               | 0               | 0   | 0   |
| pcb29                     | 0                    | 0                    | 0                  | 0               | 0               | 0   | 0   |
| pcb3                      | 0                    | 0                    | 0                  | 0               | 0               | 0   | 0   |
| pcb52                     | 0                    | 0                    | 0                  | 0               | 0               | 0   | 0   |
| pcb77                     | 0                    | 0                    | 0                  | 0               | 0               | 0   | 0   |
| ppDDT                     | 0                    | 0                    | 0                  | 0               | 0               | 0   | 0   |
| trans-2methylcyclohexanol | 0                    | 0                    | 0                  | 0               | 0               | 0   | 0   |
| Total                     | 4                    | 4                    | 4                  | 4               | 4               | 4   | 4   |

#### Jackknifed Classification Matrix (Contd.)

|                           | benzyl alcohol | cis-2methylcyclohexanol | cyclohexylmethanol | m-cresol | n-hexanes | o-cresol | opDDT | p-cresol | pcb209 |
|---------------------------|----------------|-------------------------|--------------------|----------|-----------|----------|-------|----------|--------|
| 1-methylcyclohexanol      | 0              | 0                       | 0                  | 0        | 0         | 0        | 0     | 0        | 0      |
| 1-methylcyclopentane      | 0              | 0                       | 0                  | 0        | 0         | 0        | 0     | 0        | 0      |
| 2,3-dimethylbutane        | 0              | 0                       | 0                  | 0        | 0         | 0        | 0     | 0        | 0      |
| 2-methylpentane           | 0              | 0                       | 0                  | 0        | 0         | 0        | 0     | 0        | 0      |
| 3-methylpentane           | 0              | 0                       | 0                  | 0        | 0         | 0        | 0     | 0        | 0      |
| DDD                       | 0              | 0                       | 0                  | 0        | 0         | 0        | 0     | 0        | 0      |
| DDE                       | 0              | 0                       | 0                  | 0        | 0         | 0        | 0     | 0        | 0      |
| benzyl alcohol            | 4              | 0                       | 0                  | 0        | 0         | 0        | 0     | 0        | 0      |
| cis-2methylcyclohexanol   | 0              | 4                       | 0                  | 0        | 0         | 0        | 0     | 0        | 0      |
| cyclohexylmethanol        | 0              | 0                       | 4                  | 0        | 0         | 0        | 0     | 0        | 0      |
| m-cresol                  | 0              | 0                       | 0                  | 4        | 0         | 0        | 0     | 0        | 0      |
| n-hexanes                 | 0              | 0                       | 0                  | 0        | 4         | 0        | 0     | 0        | 0      |
| o-cresol                  | 0              | 0                       | 0                  | 0        | 0         | 4        | 0     | 0        | 0      |
| opDDT                     | 0              | 0                       | 0                  | 0        | 0         | 0        | 4     | 0        | 0      |
| p-cresol                  | 0              | 0                       | 0                  | 0        | 0         | 0        | 0     | 4        | 0      |
| pcb209                    | 0              | 0                       | 0                  | 0        | 0         | 0        | 0     | 0        | 4      |
| pcb29                     | 0              | 0                       | 0                  | 0        | 0         | 0        | 0     | 0        | 0      |
| pcb3                      | 0              | 0                       | 0                  | 0        | 0         | 0        | 0     | 0        | 0      |
| pcb52                     | 0              | 0                       | 0                  | 0        | 0         | 0        | 0     | 0        | 0      |
| pcb77                     | 0              | 0                       | 0                  | 0        | 0         | 0        | 0     | 0        | 0      |
| ppDDT                     | 0              | 0                       | 0                  | 0        | 0         | 0        | 0     | 0        | 0      |
| trans-2methylcyclohexanol | 0              | 0                       | 0                  | 0        | 0         | 0        | 0     | 0        | 0      |
| Total                     | 4              | 4                       | 4                  | 4        | 4         | 4        | 4     | 4        | 4      |

Jackknifed Classification Matrix (Contd.)

|                          | pcb29 | pcb3 | pcb52 | pcb77 | ppDDT | trans-2methylcy-<br>clohexano | %correct |
|--------------------------|-------|------|-------|-------|-------|-------------------------------|----------|
| 1-methylcyclohexanol     | 0     | 0    | 0     | 0     | 0     | 0                             | 100      |
| 1-methylcyclopentane     | 0     | 0    | 0     | 0     | 0     | 0                             | 100      |
| 2,3-dimethylbutane       | 0     | 0    | 0     | 0     | 0     | 0                             | 100      |
| 2-methylpentane          | 0     | 0    | 0     | 0     | 0     | 0                             | 100      |
| 3-methylpentane          | 0     | 0    | 0     | 0     | 0     | 0                             | 100      |
| DDD                      | 0     | 0    | 0     | 0     | 0     | 0                             | 100      |
| DDE                      | 0     | 0    | 0     | 0     | 0     | 0                             | 100      |
| benzyl alcohol           | 0     | 0    | 0     | 0     | 0     | 0                             | 100      |
| cis-2methylcyclohexanol  | 0     | 0    | 0     | 0     | 0     | 0                             | 100      |
| cyclohexylmethanol       | 0     | 0    | 0     | 0     | 0     | 0                             | 100      |
| m-cresol                 | 0     | 0    | 0     | 0     | 0     | 0                             | 100      |
| n-hexanes                | 0     | 0    | 0     | 0     | 0     | 0                             | 100      |
| o-cresol                 | 0     | 0    | 0     | 0     | 0     | 0                             | 100      |
| opDDT                    | 0     | 0    | 0     | 0     | 0     | 0                             | 100      |
| p-cresol                 | 0     | 0    | 0     | 0     | 0     | 0                             | 100      |
| pcb209                   | 0     | 0    | 0     | 0     | 0     | 0                             | 100      |
| pcb29                    | 4     | 0    | 0     | 0     | 0     | 0                             | 100      |
| pcb3                     | 0     | 4    | 0     | 0     | 0     | 0                             | 100      |
| pcb52                    | 0     | 0    | 4     | 0     | 0     | 0                             | 100      |
| pcb77                    | 0     | 0    | 0     | 4     | 0     | 0                             | 100      |
| ppDDT                    | 0     | 0    | 0     | 0     | 4     | 0                             | 100      |
| trans-2methylcyclohexano | 0     | 0    | 0     | 0     | 0     | 4                             | 100      |
| Total                    | 4     | 4    | 4     | 4     | 4     | 4                             | 100      |

Cumulative Proportion of Total Dispersion

|       |       |       |
|-------|-------|-------|
| 0.908 | 0.994 | 1.000 |
|-------|-------|-------|

Aromatics

Jackknifed Classification Matrix

|                | benzyl alcohol | m-cresol | o-cresol | p-cresol | %correct |
|----------------|----------------|----------|----------|----------|----------|
| benzyl alcohol | 4              | 0        | 0        | 0        | 100      |
| m-cresol       | 0              | 4        | 0        | 0        | 100      |
| o-cresol       | 0              | 0        | 4        | 0        | 100      |
| p-cresol       | 0              | 0        | 0        | 4        | 100      |
| Total          | 4              | 4        | 4        | 4        | 100      |

Cumulative Proportion of Total Dispersion

|       |       |       |
|-------|-------|-------|
| 0.859 | 0.950 | 1.000 |
|-------|-------|-------|

## Pesticides

### Jackknifed Classification Matrix

|       | DDD | DDE | opDDT | ppDDT | %correct |
|-------|-----|-----|-------|-------|----------|
| DDD   | 4   | 0   | 0     | 0     | 100      |
| DDE   | 0   | 4   | 0     | 0     | 100      |
| opDDT | 0   | 0   | 4     | 0     | 100      |
| ppDDT | 0   | 0   | 0     | 4     | 100      |
| Total | 4   | 4   | 4     | 4     | 100      |

### Cumulative Proportion of Total Dispersion

|       |       |       |
|-------|-------|-------|
| 0.995 | 1.000 | 1.000 |
|-------|-------|-------|

## Alkanes

### Jackknifed Classification Matrix

|                      | 1-methylcyclopentane | 2,3-dimethylbutane | 2-methylpentane | 3-methylpentane | n-hexanes | %correct |
|----------------------|----------------------|--------------------|-----------------|-----------------|-----------|----------|
| 1-methylcyclopentane | 4                    | 0                  | 0               | 0               | 0         | 100      |
| 2,3-dimethylbutane   | 0                    | 4                  | 0               | 0               | 0         | 100      |
| 2-methylpentane      | 0                    | 0                  | 4               | 0               | 0         | 100      |
| 3-methylpentane      | 0                    | 0                  | 0               | 4               | 0         | 100      |
| n-hexanes            | 0                    | 0                  | 0               | 0               | 4         | 100      |
| Total                | 4                    | 4                  | 4               | 4               | 4         | 100      |

### Cumulative Proportion of Total Dispersion

|       |       |       |
|-------|-------|-------|
| 0.767 | 0.930 | 1.000 |
|-------|-------|-------|

## Aliphatic alcohols

### Jackknifed Classification Matrix

|                           | 1-methylcyclohexanol | cis-2methylcyclohexanol | cyclohexylmethanol | trans-2methylcyclohexanol | %correct |
|---------------------------|----------------------|-------------------------|--------------------|---------------------------|----------|
| 1-methylcyclohexanol      | 4                    | 0                       | 0                  | 0                         | 100      |
| cis-2methylcyclohexanol   | 0                    | 4                       | 0                  | 0                         | 100      |
| cyclohexylmethanol        | 0                    | 0                       | 4                  | 0                         | 100      |
| trans-2methylcyclohexanol | 0                    | 0                       | 0                  | 4                         | 100      |
| Total                     | 4                    | 4                       | 4                  | 4                         | 100      |

### Cumulative Proportion of Total Dispersion

|       |       |       |
|-------|-------|-------|
| 0.775 | 0.990 | 1.000 |
|-------|-------|-------|

## PCBs

### Jackknifed Classification Matrix

|        | pcb209 | pcb29 | pcb3 | pcb52 | pcb77 | %correct |
|--------|--------|-------|------|-------|-------|----------|
| pcb209 | 4      | 0     | 0    | 0     | 0     | 100      |
| pcb29  | 0      | 4     | 0    | 0     | 0     | 100      |
| pcb3   | 0      | 0     | 4    | 0     | 0     | 100      |
| pcb52  | 0      | 0     | 0    | 4     | 0     | 100      |
| pcb77  | 0      | 0     | 0    | 0     | 4     | 100      |
| Total  | 4      | 4     | 4    | 4     | 4     | 100      |

### Cumulative Proportion of Total Dispersion

|       |       |       |
|-------|-------|-------|
| 0.806 | 0.996 | 1.000 |
|-------|-------|-------|



### 1:1 binary mixtures of analytes 5-8

#### Jackknifed Classification Matrix

|       | BA-M | BA-O | BA-P | M-P | O-M | O-P | %correct |
|-------|------|------|------|-----|-----|-----|----------|
| BA-M  | 2    | 0    | 0    | 0   | 0   | 2   | 50       |
| BA-O  | 0    | 4    | 0    | 0   | 0   | 0   | 100      |
| BA-P  | 1    | 0    | 3    | 0   | 0   | 0   | 75       |
| M-P   | 0    | 0    | 0    | 4   | 0   | 0   | 100      |
| O-M   | 0    | 0    | 0    | 0   | 4   | 0   | 100      |
| O-P   | 1    | 0    | 0    | 0   | 0   | 3   | 75       |
| Total | 4    | 4    | 3    | 4   | 4   | 5   | 83       |

#### Cumulative Proportion of Total Dispersion

|       |       |       |
|-------|-------|-------|
| 0.889 | 0.981 | 1.000 |
|-------|-------|-------|

## SUMMARY FIGURES

### SUMMARY FIGURES FOR HPLC ANALYSIS OF COMPOUNDS S2 AND S3

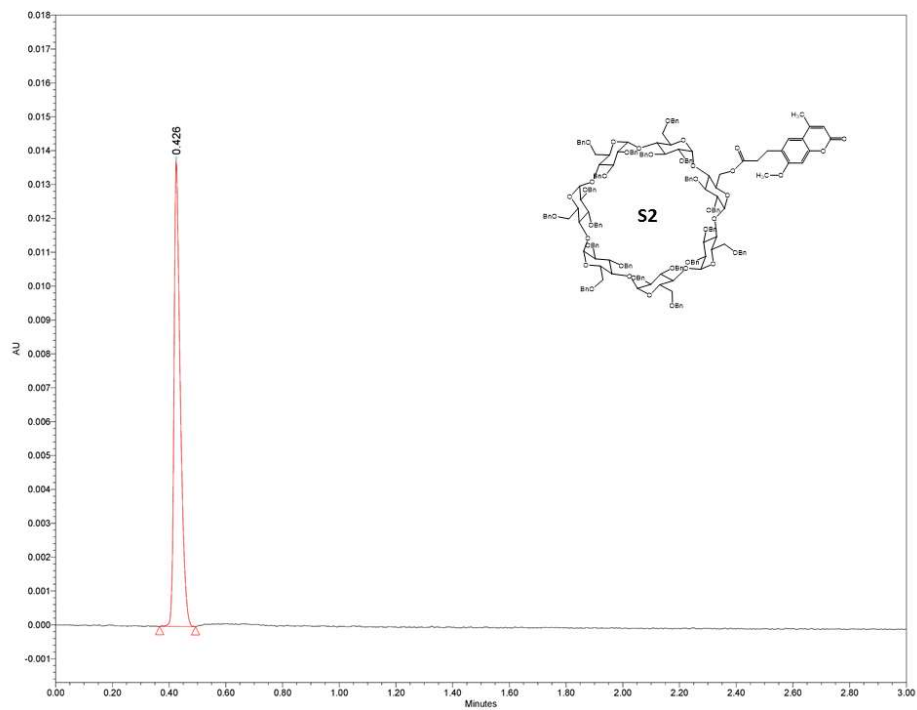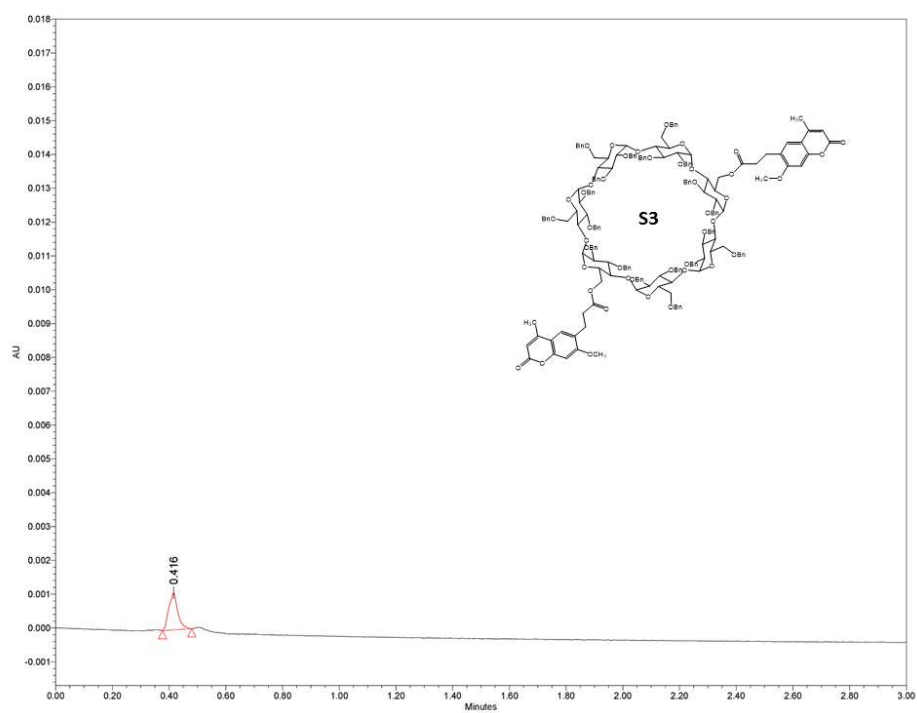

## SUMMARY FIGURES FOR FLUORESCENCE MODULATION

*o*-Cresol

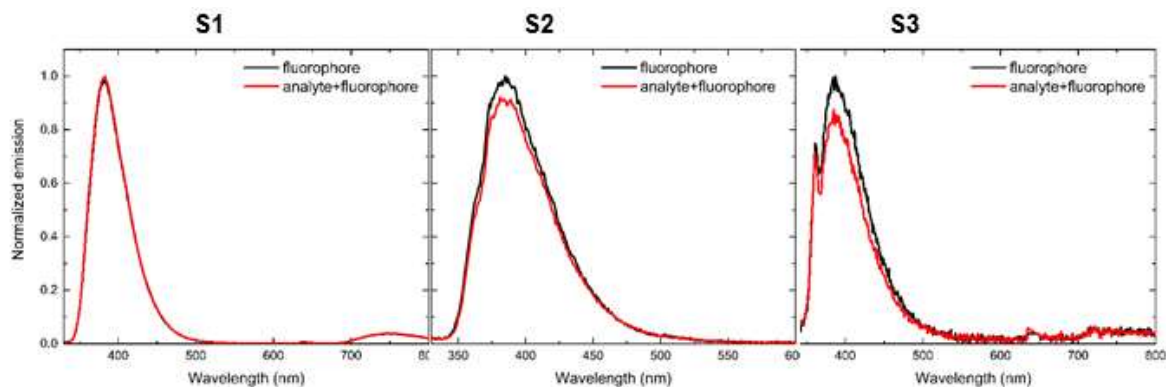

*m*-Cresol

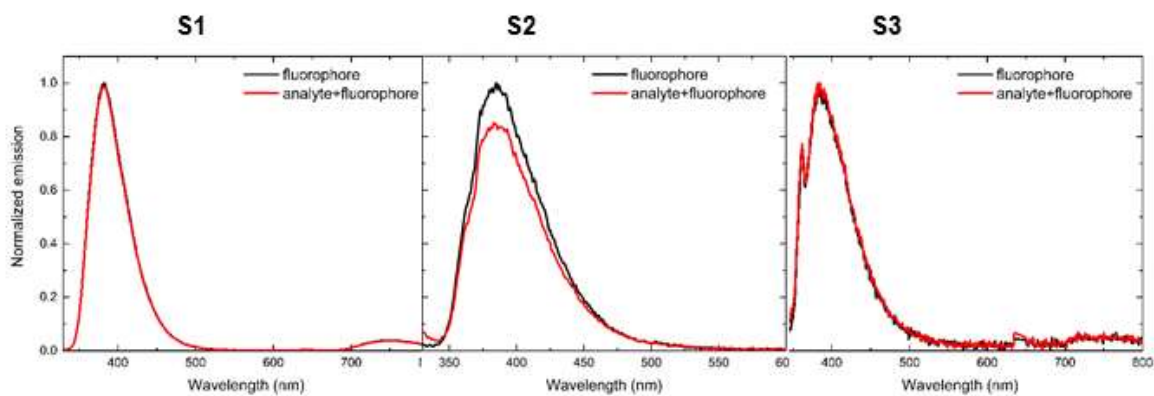

*p*-Cresol

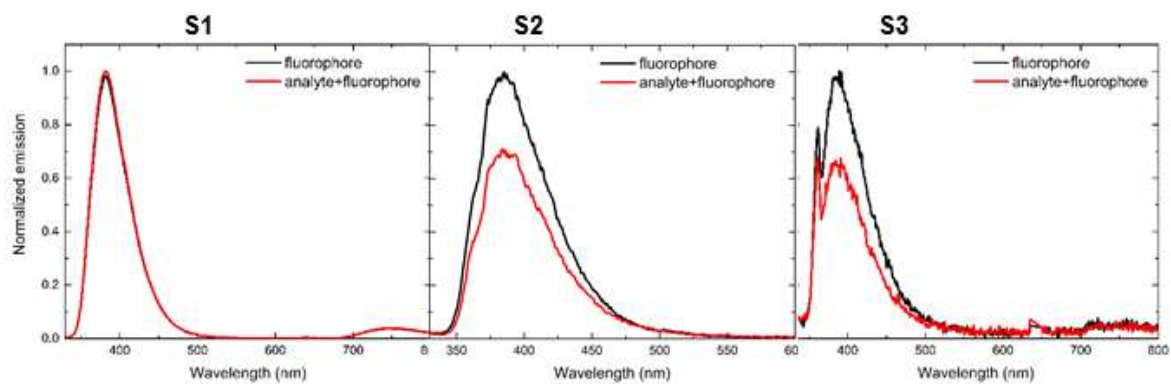

DDD

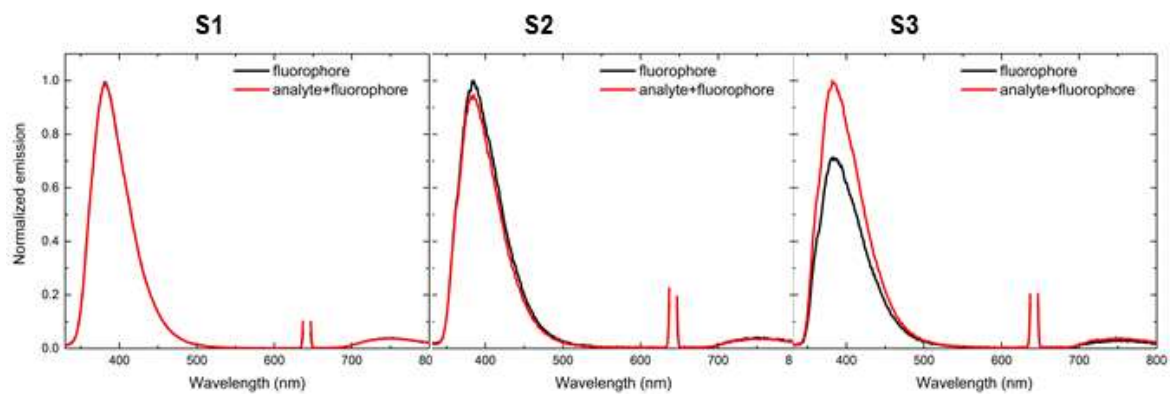

DDE

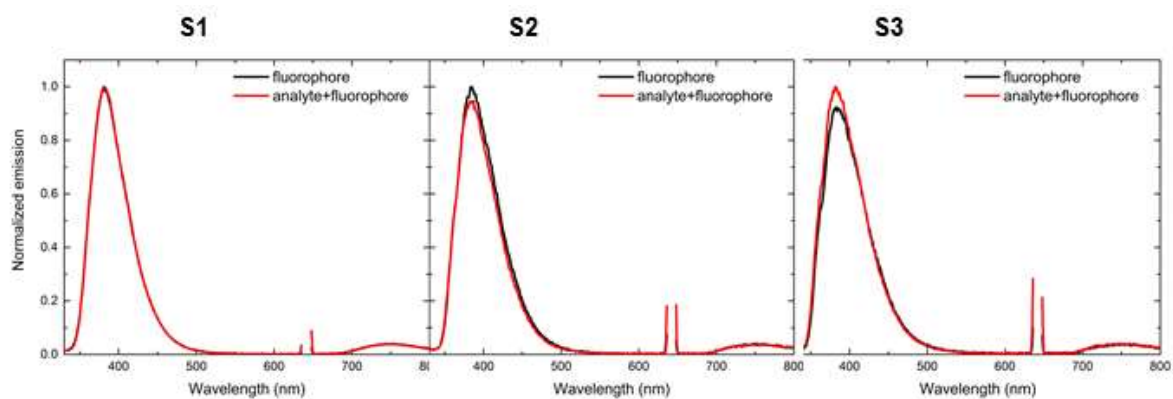

*o,p*-DDT

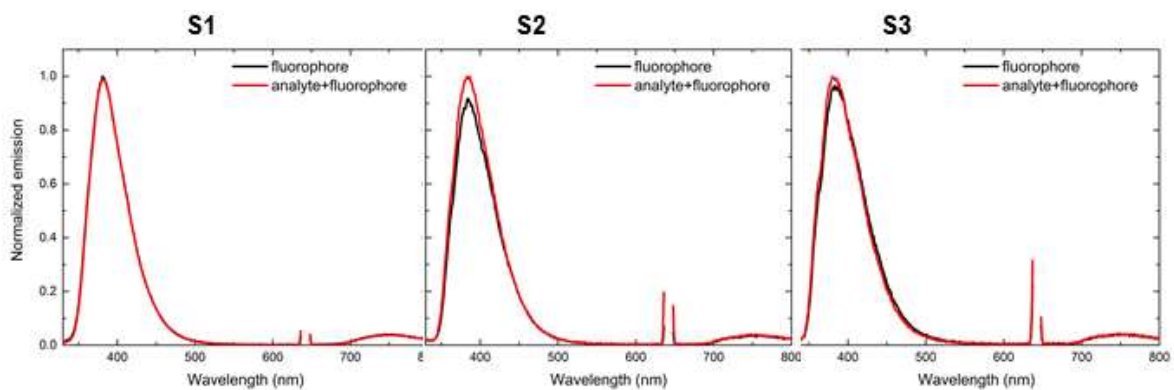

*p,p*-DDT

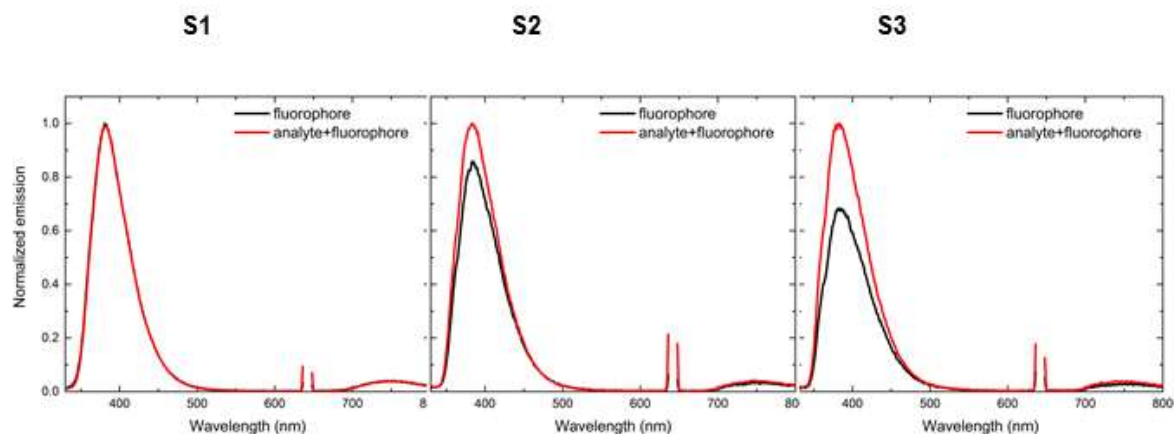

*n*-Hexanes

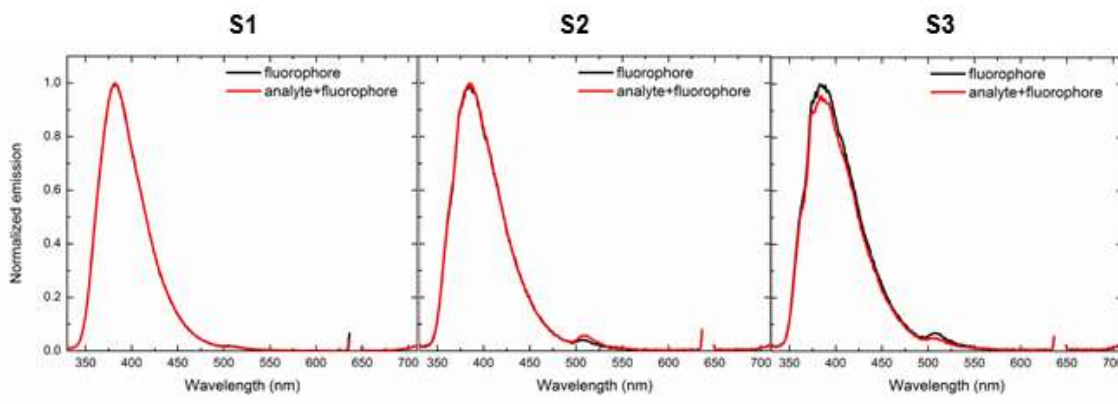

2-Methylpentane

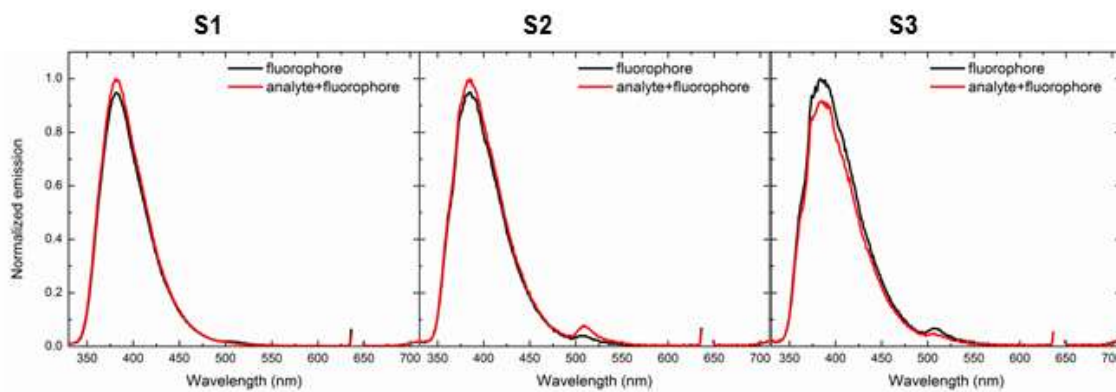

### 3-Methylpentane

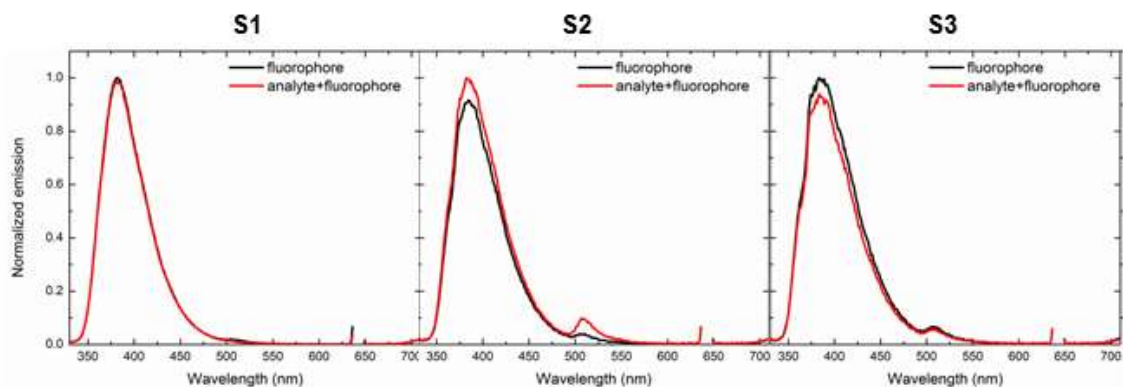

### 2,3-Dimethylbutane

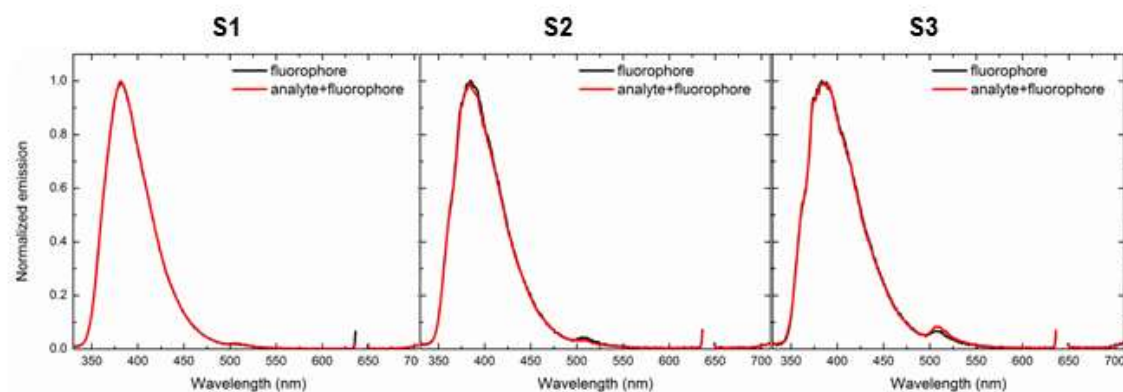

### 1-Methylcyclopentane

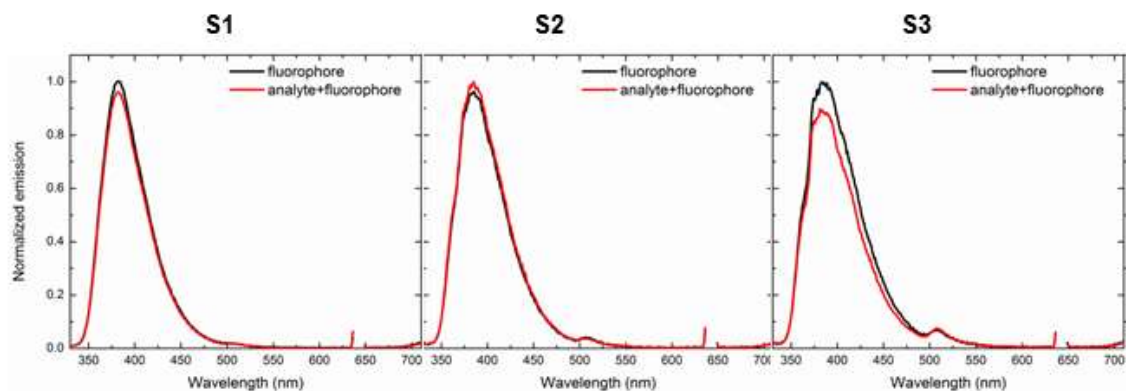

## 1-Methylcyclohexanol

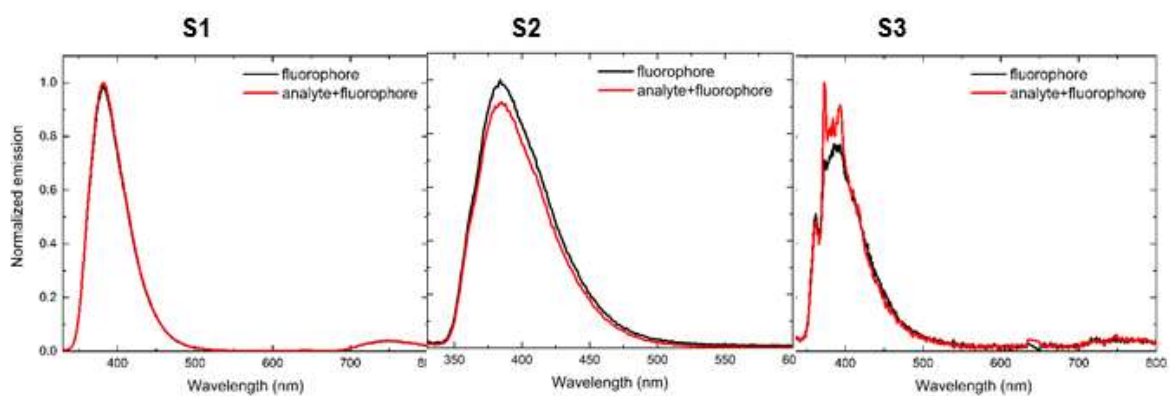

## *cis*-2-Methylcyclohexanol

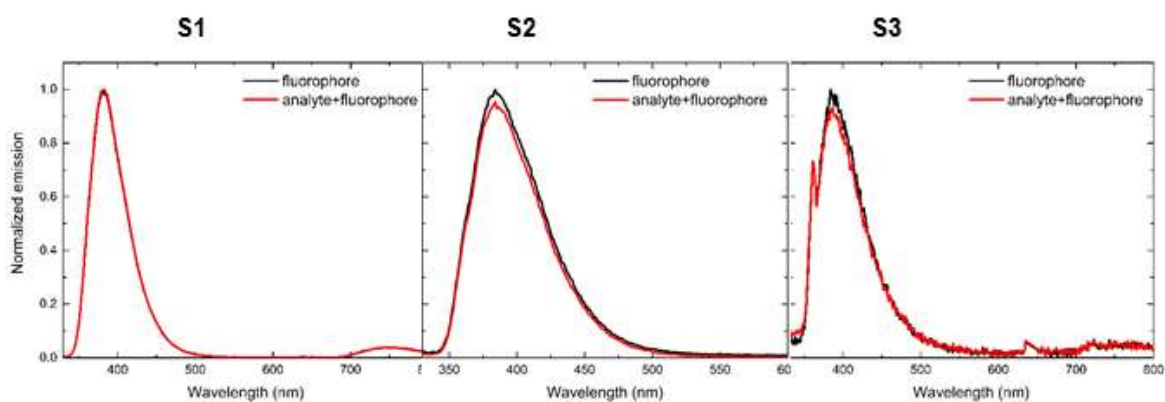

## *trans*-2-Methylcyclohexanol

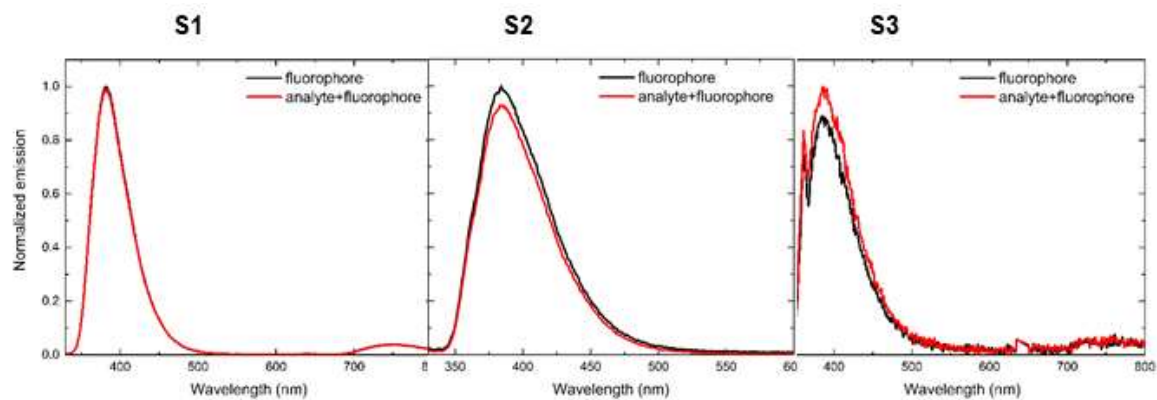

PCB3

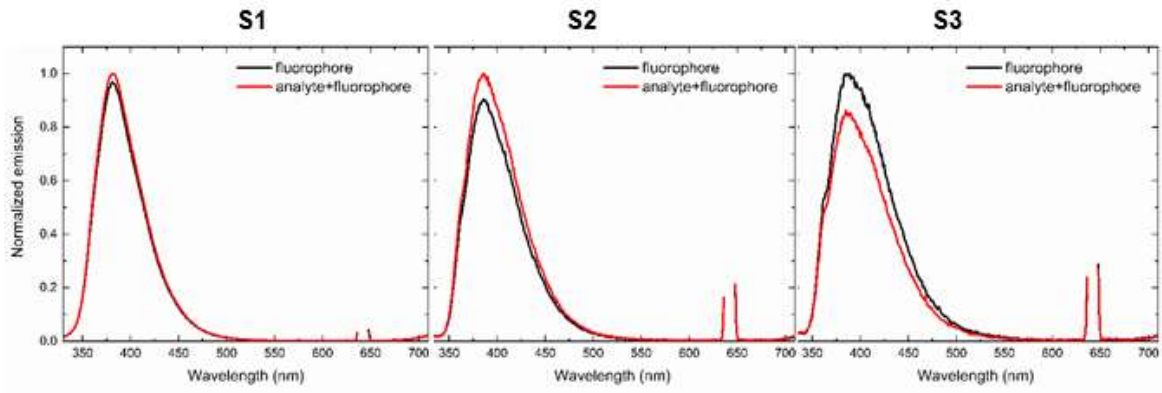

PCB29

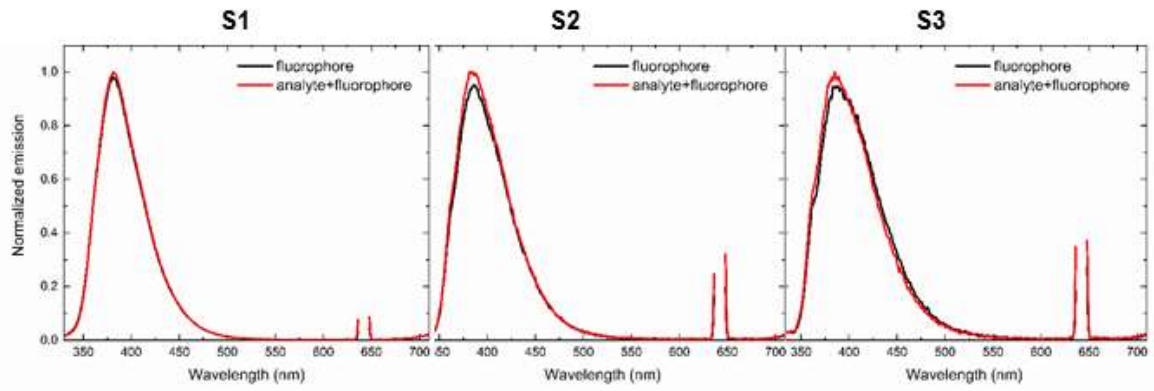

PCB52

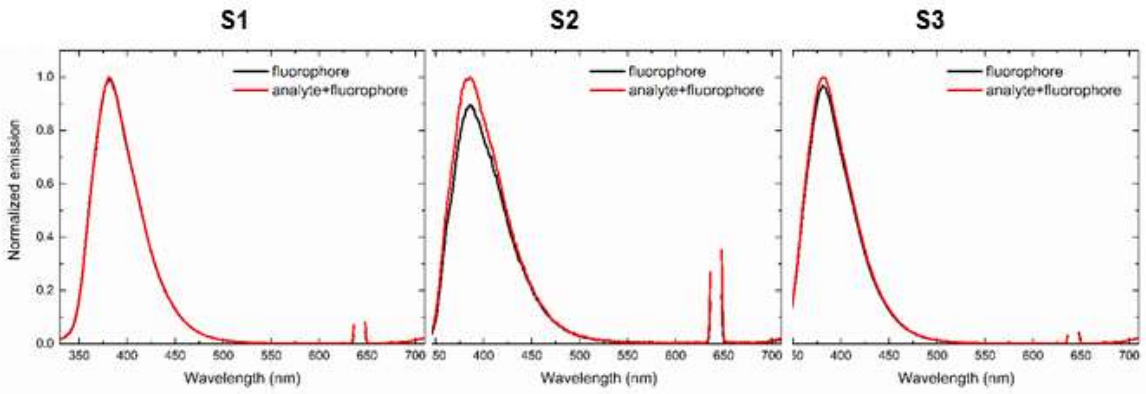



PCB77

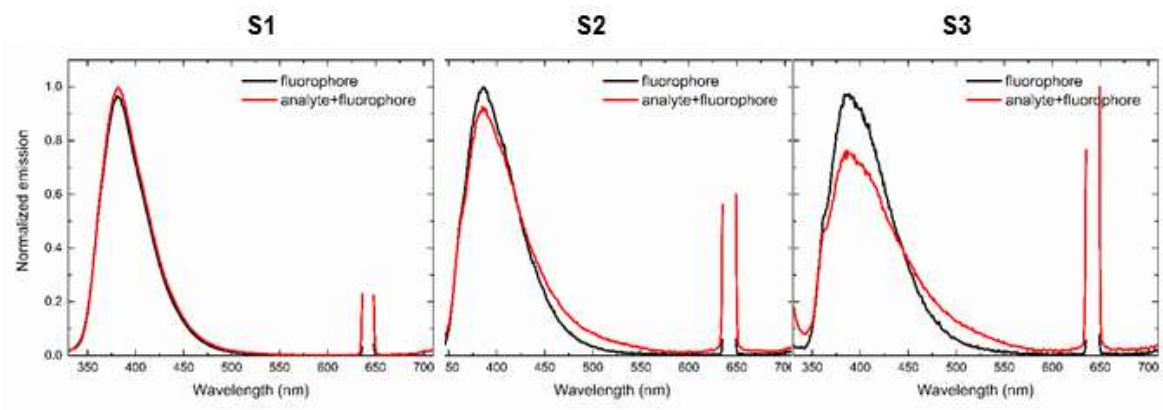

PCB209

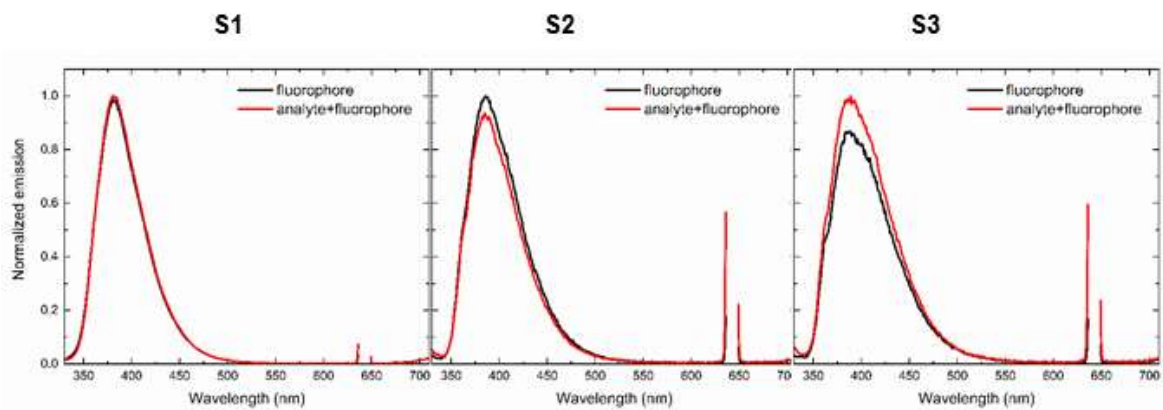

# SUMMARY FIGURES FOR LIMIT OF DETECTION EXPERIMENTS

## *p,p*-DDT – S1

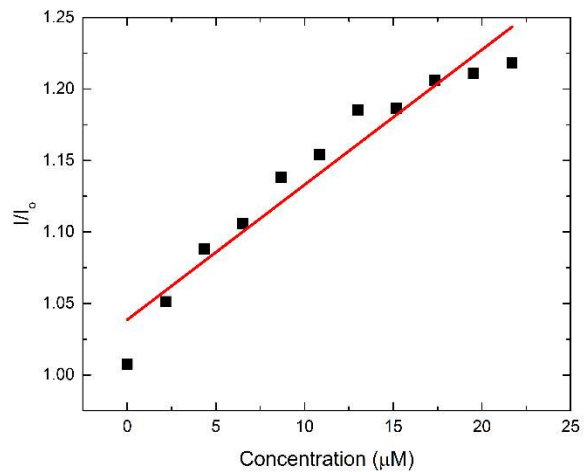

## *p,p*-DDT – S2

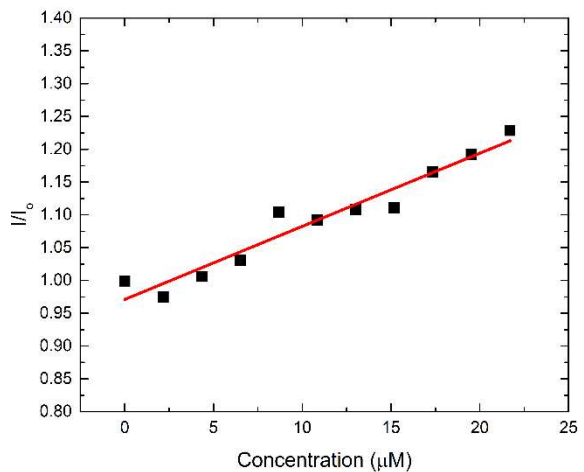

## *p,p*-DDT – S3

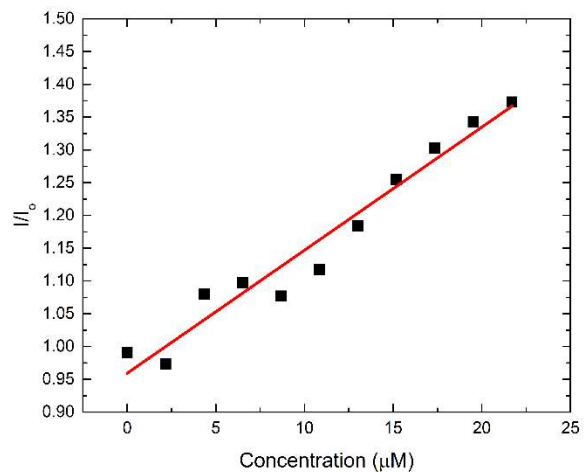

*o*-Cresol – S1

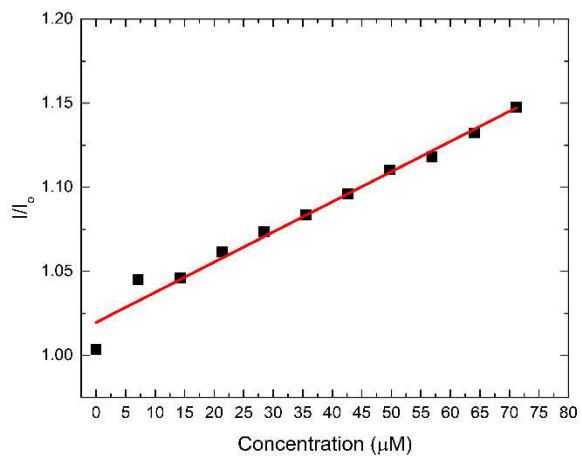

Benzyl alcohol – S2

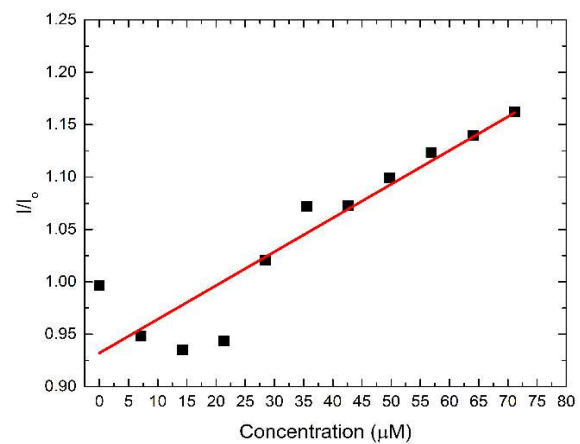

*o*-Cresol – S3

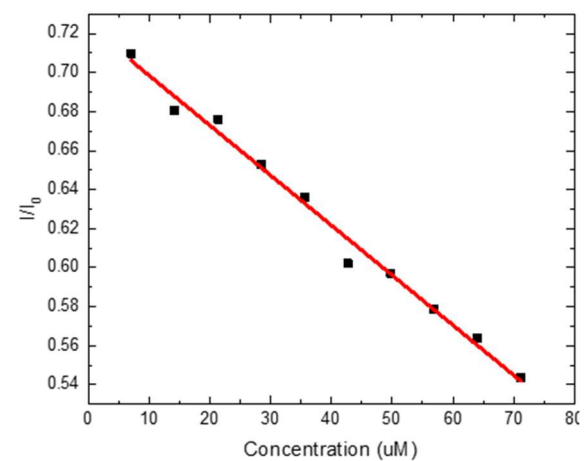

### Cyclohexylmethanol – S1

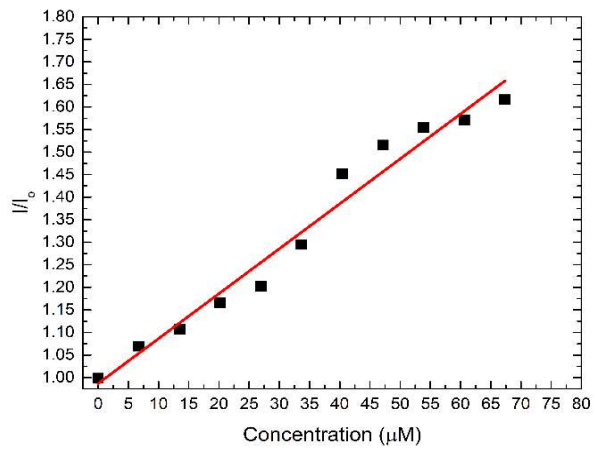

### Cyclohexylmethanol – S2

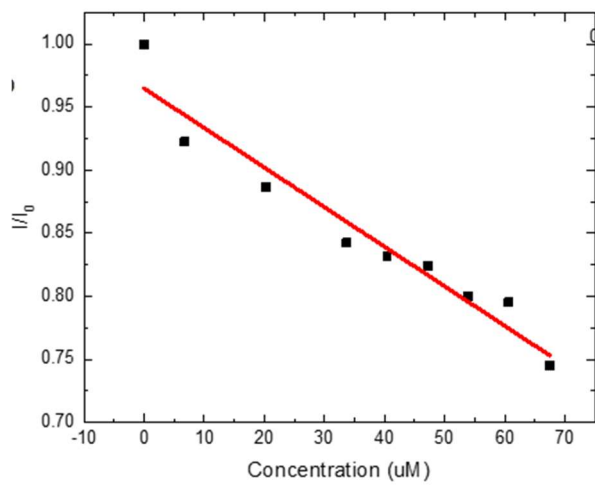

### 1-Methylcyclohexanol – S3

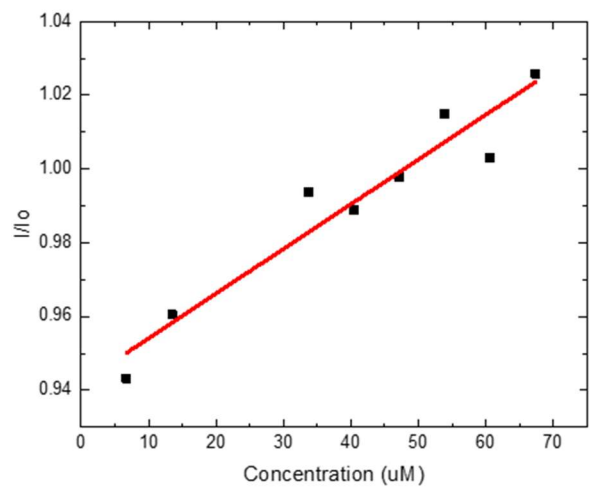

PCB77 – S1

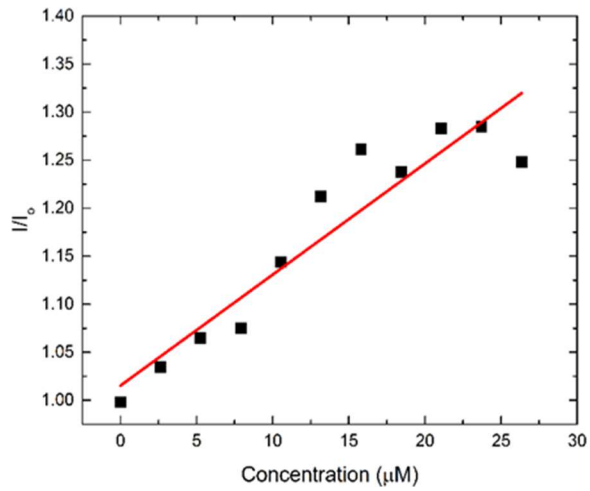

PCB209 – S2

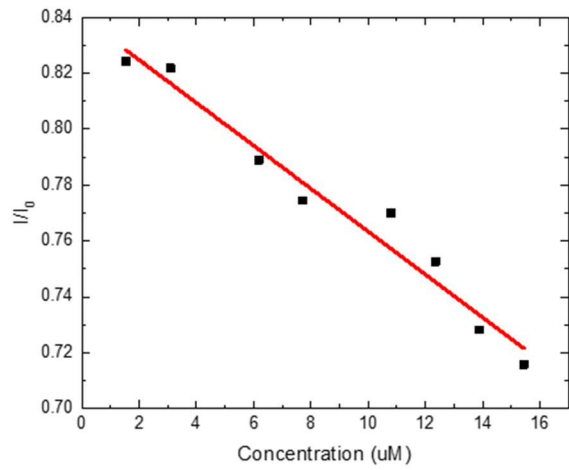

PCB209 – S3

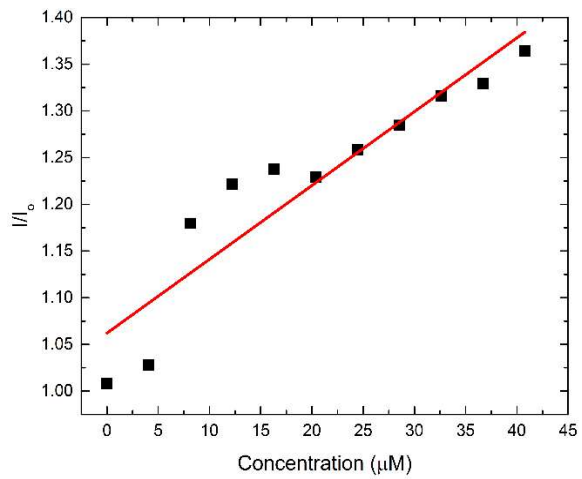

### 2-Methylpentane – S1

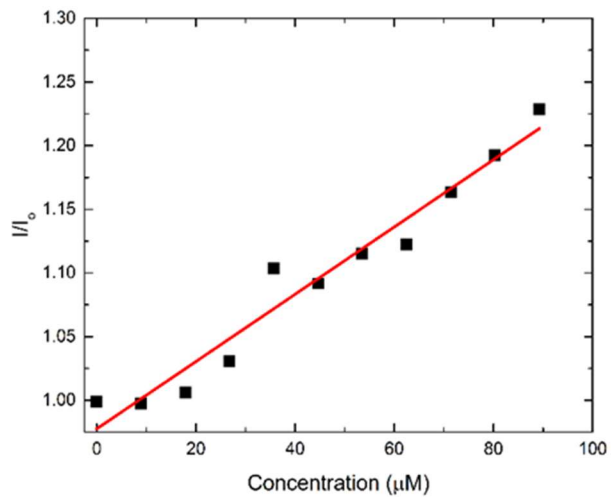

### 3-Methylpentane – S2

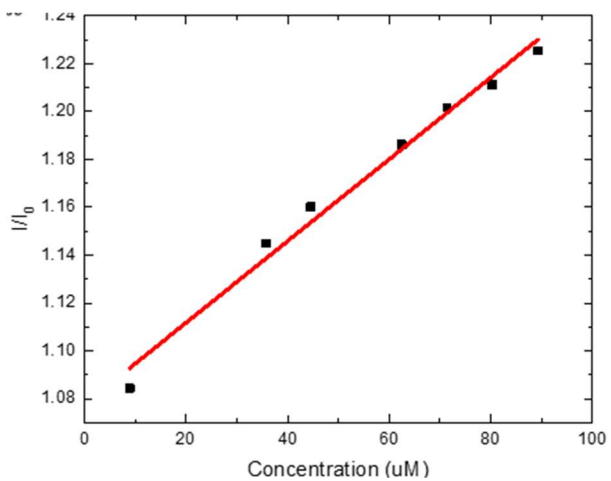

### 1-Methylcyclopentane – S3

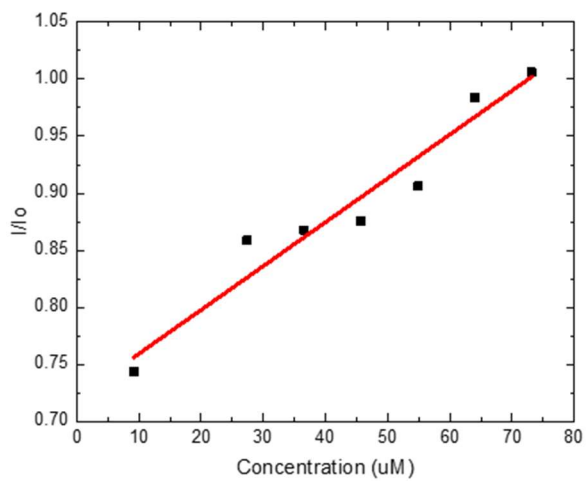

# SUMMARY FIGURES FOR ARRAY GENERATION EXPERIMENTS

## All Analytes

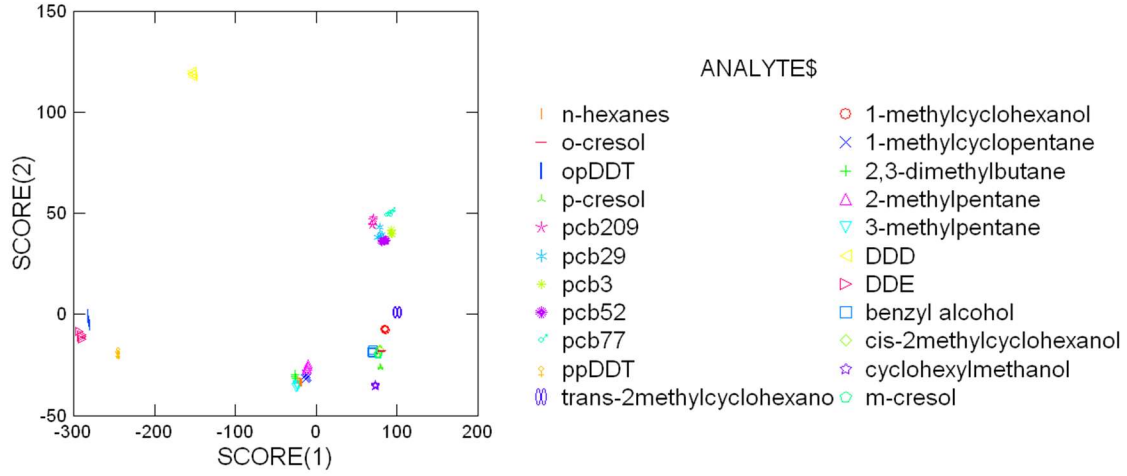

## Aromatics

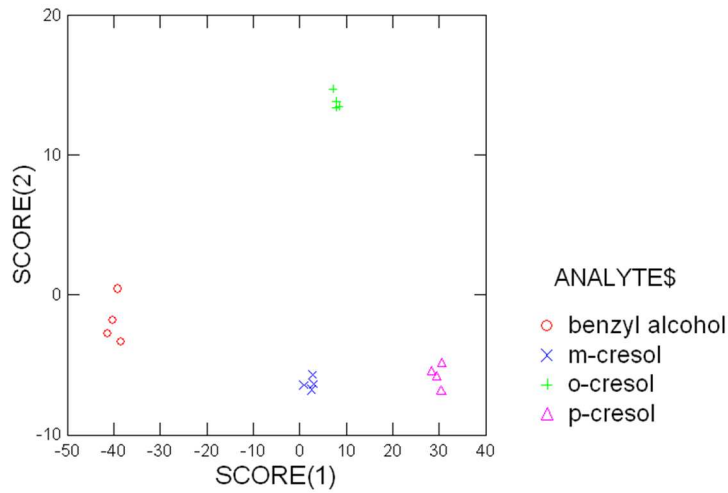

## Pesticides

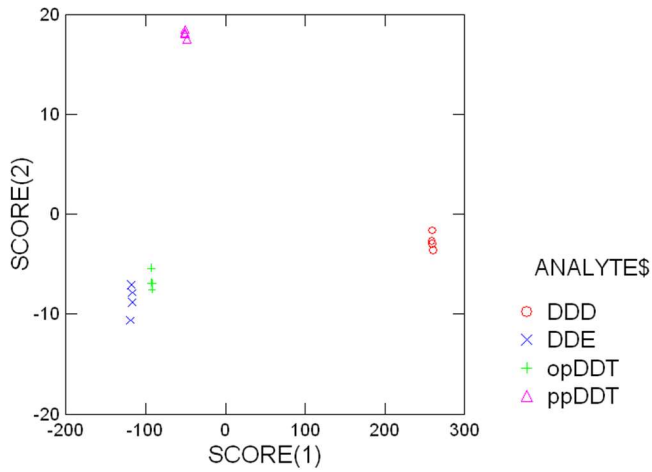

### Alkanes

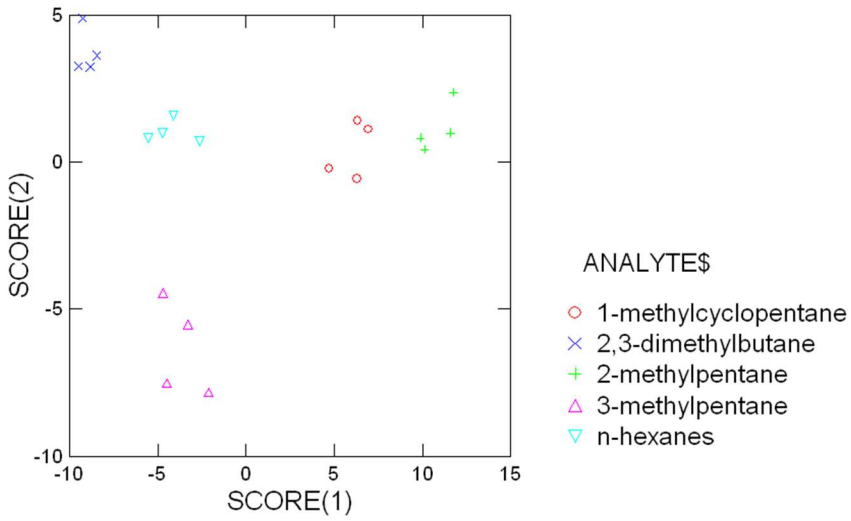

### Alcohols

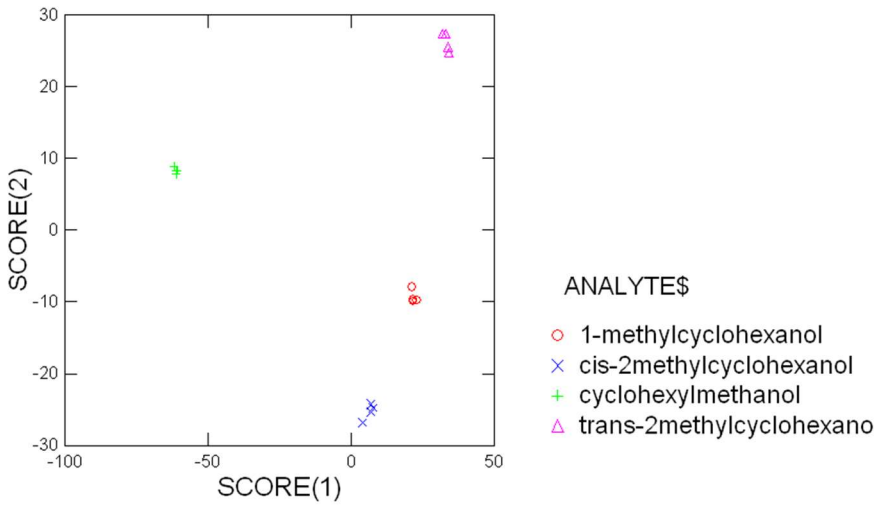

### PCBs

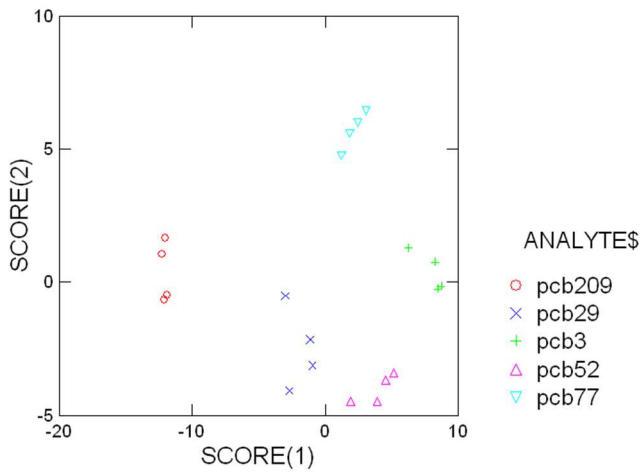





# NMR SPECTRA OF ALL NEW COMPOUNDS

## Compound 2

### $^1\text{H}$ NMR

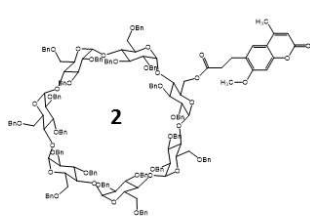

$^1\text{H}$  – NMR Spectrum  
(500MHz)

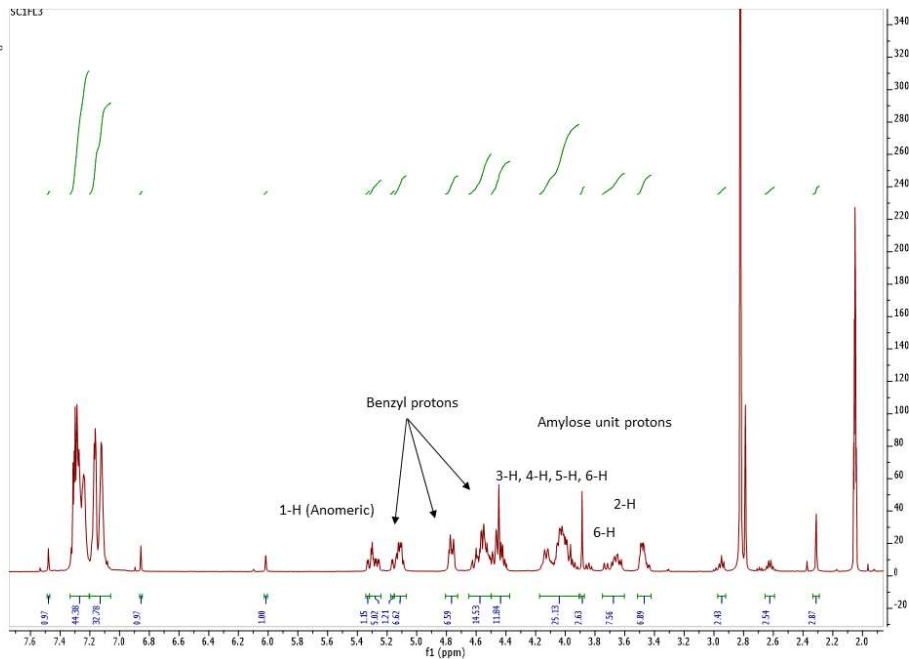

### $^{13}\text{C}$ NMR

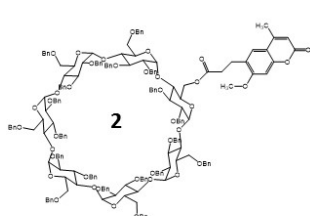

$^{13}\text{C}$  – NMR Spectrum  
(500MHz)

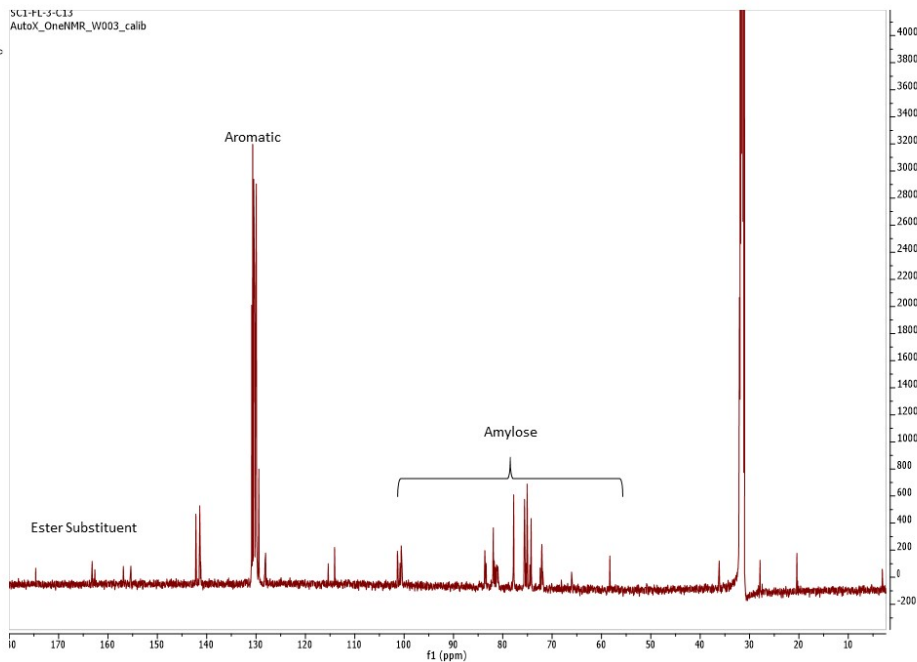

## COSY NMR

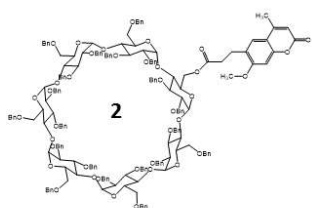

$^1\text{H}/^1\text{H}$  COSY – NMR  
Spectrum (500MHz)

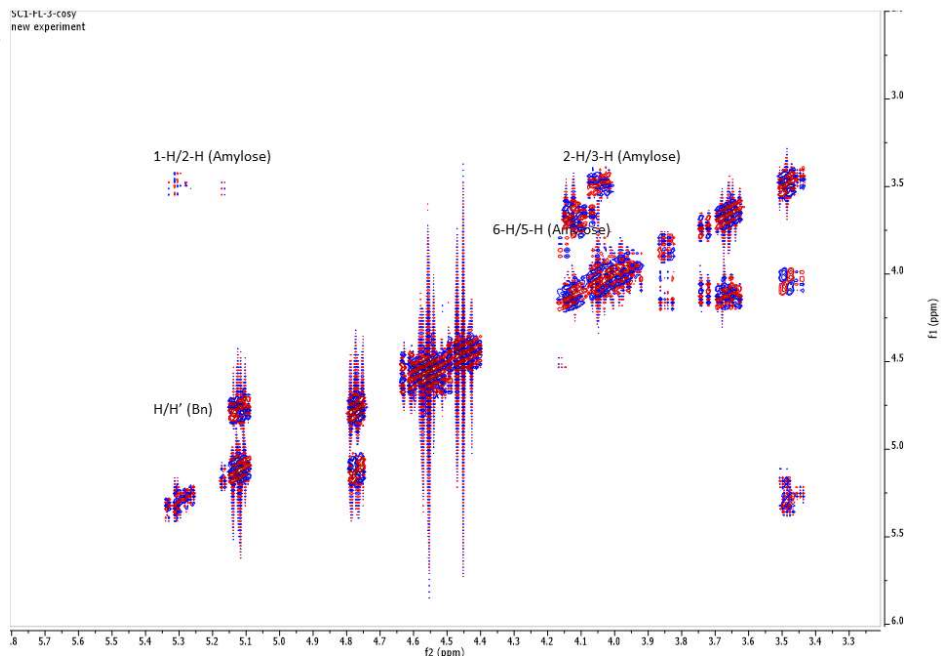

## Compound 3

### $^1\text{H}$ NMR

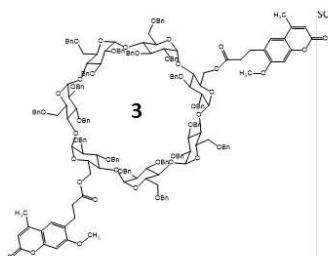

$^1\text{H}$  – NMR Spectrum  
(500MHz)

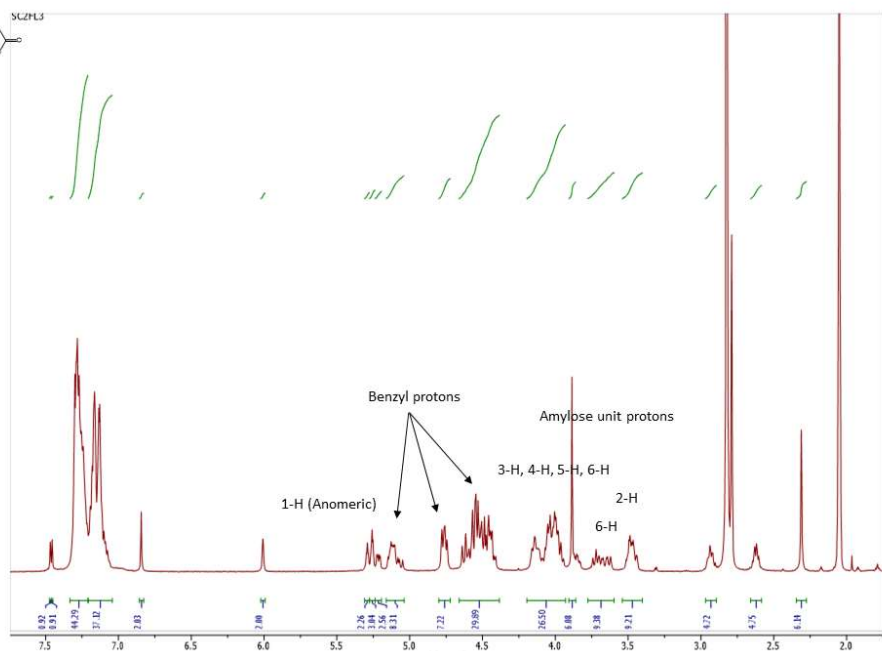

# $^{13}\text{C}$ NMR

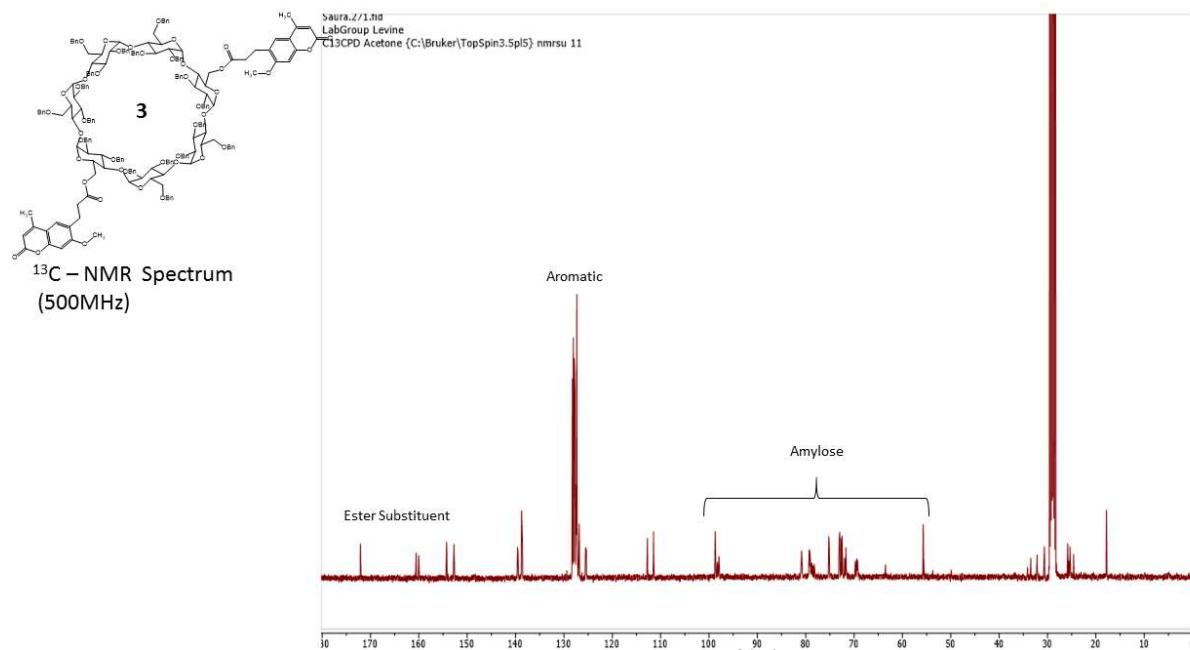

# COSY NMR

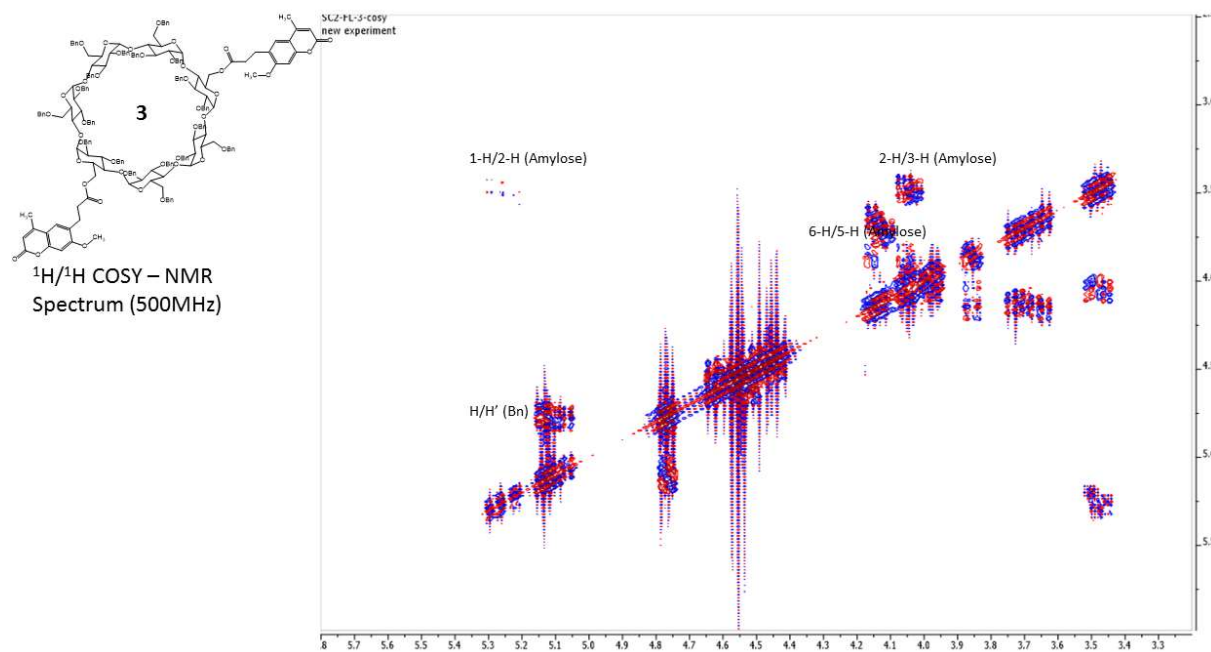

## SPECTROSCOPIC INVESTIGATIONS OF SENSORS S1-S3

### ABSORPTION SPECTRA

UV-Visible Absorption Spectra of S2 and S3 (1 $\mu$ M) in DMSO measured at room temperature:

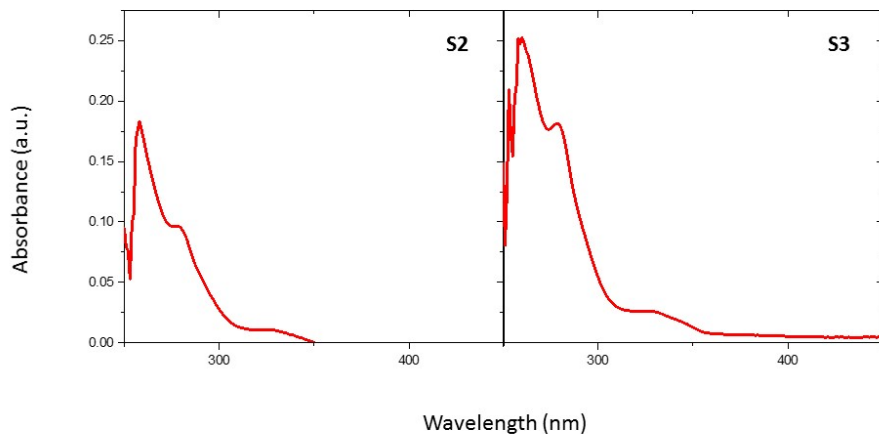

### VARIATION OF FLUORESCENCE EMISSION OF SENSORS IN H<sub>2</sub>O/DMSO MIXTURES

Fluorescence emission spectra of S1, S2 and S3 (at 1  $\mu$ M concentration) in 80:20 (H<sub>2</sub>O: DMSO) (black trace), 60:40 (H<sub>2</sub>O: DMSO) (red trace), 40:60 (H<sub>2</sub>O: DMSO) (blue trace), 20:80 (H<sub>2</sub>O: DMSO) (purple trace), 0:100 (H<sub>2</sub>O:DMSO) (green trace). ( $\lambda_{\text{ex}} = 320$  nm). All spectra were recorded at room temperature.

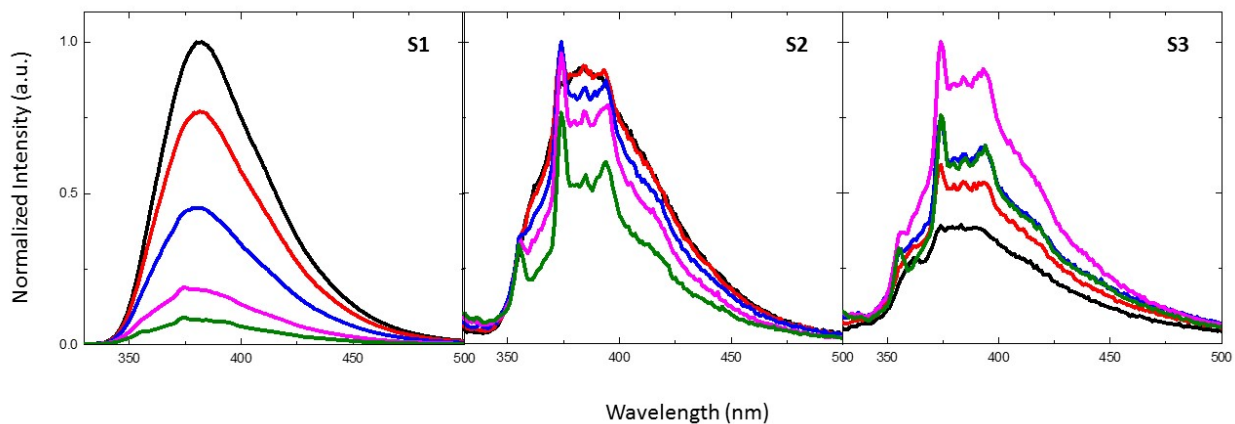

## BENESI-HILDEBRAND PLOTS FOR NMR TITRATION

Analyte **5** (0.2 M in 0.4 mL D<sub>2</sub>O) was titrated against 0 μL, 10 μL, 20 μL, 25 μL, 30 μL, 35 μL, 40 μL, 50 μL, 60 μL, 80 μL and 100 μL of the host (1 mg/mL dissolved in d<sub>6</sub>-DMSO) in a clean dry NMR tube. The volume was adjusted to 0.5 mL final volume with the addition of d<sub>6</sub>-DMSO. The <sup>1</sup>H-NMR spectra of the samples were recorded in 300 MHz Bruker AVANCE NMR Spectrometer at room temperature. The chemical shift of benzylic protons (highlighted in red in the figure below) were tracked, and the data was used to solve the Benesi-Hildebrand equation, below.

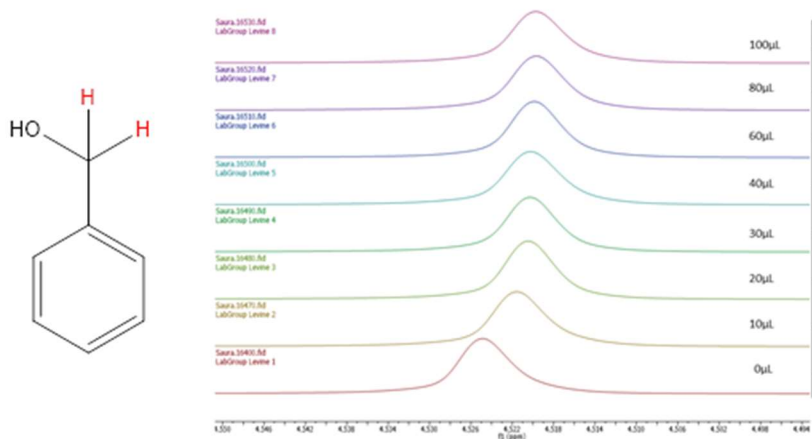

*Benesi-Hildebrand Equation:*

$$1/\Delta\delta = (1/K_a \Delta\delta_{\max})1/[H] + (1/\Delta\delta_{\max}) \quad (\text{Eq. S3})$$

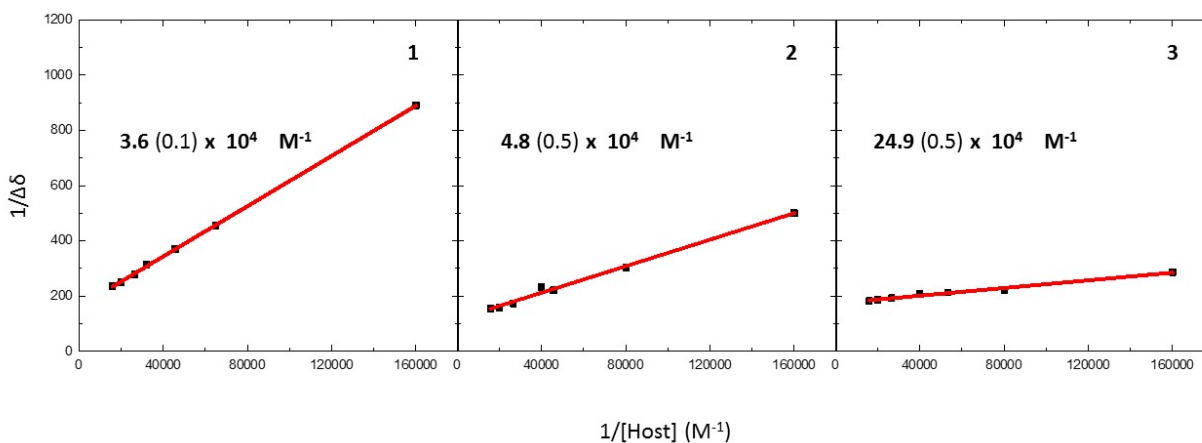

| Host     | Equation             | K <sub>a</sub> (M <sup>-1</sup> ) | Δδ <sub>max</sub> (ppm) |
|----------|----------------------|-----------------------------------|-------------------------|
| <b>1</b> | y = 0.0045x + 162.97 | 3.6(0.1) x 10 <sup>4</sup>        | 0.0061                  |
| <b>2</b> | y = 0.0024x + 116.62 | 4.8(0.5) x 10 <sup>4</sup>        | 0.0085                  |
| <b>3</b> | y = 0.0007x + 173.27 | 24.9(0.5) x 10 <sup>4</sup>       | 0.0057                  |

Benesi-Hildebrand plots for association constant calculations of analyte **5** with compounds **1**, **2** and **3** in 80:20 water-DMSO at room temperature. (H is the host; K<sub>a</sub> is association constant; Δδ<sub>max</sub> is maximum peak shift at infinite host concentration [H] = ∞; Δδ is the peak shift at a given host concentration. Values in parentheses indicate to the error in the K<sub>a</sub> values from linear fit of the data points.)
